27 **Abstract**

28

29 Brain-derived neurotrophic factor (BDNF) is critically involved in the pathophysiology of chronic pain.  
30 However, the mechanisms of BDNF action on specific neuronal populations in the spinal superficial  
31 dorsal horn (SDH) requires further study. We used chronic BDNF treatment (200 ng/ml, 5-6 days) of  
32 defined-medium, serum-free spinal organotypic cultures to study intracellular calcium ( $[Ca^{2+}]_i$ )  
33 fluctuations. A detailed quantitative analysis of these fluctuations using the Frequency-independent  
34 biological signal identification (FIBSI) program revealed that BDNF simultaneously depressed activity in  
35 some SDH neurons while it unmasked a particular subpopulation of 'silent' neurons causing them to  
36 become spontaneously active. Blockade of gap junctions disinhibited a subpopulation of SDH neurons  
37 and reduced BDNF-induced synchrony in BDNF-treated cultures. BDNF reduced neuronal excitability by  
38 measuring spontaneous excitatory postsynaptic currents. This was similar to the depressive effect of  
39 BDNF on the  $[Ca^{2+}]_i$  fluctuations. This study reveals novel regulatory mechanisms of SDH neuronal  
40 excitability in response to BDNF.

## 41 **Introduction**

42 Injury to, or disease of, the somatosensory system frequently generates chronic and sometimes  
43 intractable neuropathic pain (1,2). In experimental animals, peripheral nerve damage, such as that  
44 generated by chronic constriction or section of the sciatic nerve, induces pain-related behaviours that  
45 serve as a model for human neuropathic pain (3,4). Seven or more days of sciatic nerve injury promote  
46 an enduring increase in the excitability of first order primary afferent neurons (5–8). These become  
47 chronically active and release a variety of mediators (cytokines, chemokines, neuropeptides, ATP and  
48 growth factors) that predispose spinal microglia to a more ‘activated’ state (9–14). These in turn, release  
49 further mediators, including brain derived neurotrophic factor (BDNF) that promote a slowly developing,  
50 but persistent increase in excitability of second order neurons in the spinal dorsal horn. This ‘central  
51 sensitization’ is thought to be responsible for the allodynia, hyperalgesia, spontaneous pain and causalgia  
52 that characterize neuropathic pain (3,15). Spinal actions of BDNF involve alteration in  $\text{Cl}^-$  gradients such  
53 that the normally inhibitory actions of GABA become excitatory (16,17). There is also increased excitatory  
54 synaptic drive to putative excitatory neurons (9,18). This results in an overall increase in excitability as  
55 monitored by confocal  $\text{Ca}^{2+}$  imaging in organotypic cultures of rat or mouse spinal cord (9,18–20). Despite  
56 this, the long-term effects of upregulated BDNF on neuronal plasticity in the superficial dorsal horn (SDH)  
57 are not fully understood.

58

59 Naïve cultures display spontaneous oscillatory changes in intracellular  $\text{Ca}^{2+}$  levels  $[\text{Ca}^{2+}]_i$  and we have  
60 previously shown that the amplitude and frequency of these changes in  $[\text{Ca}^{2+}]_i$  are profoundly increased  
61 following 5-6 d treatment with BDNF (20). We used this model and a new Frequency-independent  
62 biological signal identification (FIBSI) (21) program to quantitatively measure the fluctuations of  $[\text{Ca}^{2+}]_i$   
63 and examine their synchronicity. Unexpectedly, we observed two opposite effects of BDNF that appeared  
64 to occur simultaneously. First, BDNF caused an overall decrease in fluctuation size. Second, we noticed  
65 a particular population of SDH neurons in naïve cultures that did not display typical, marked fluctuations  
66 of  $[\text{Ca}^{2+}]_i$ . This population of ‘silent’ neurons was absent in BDNF-treated cultures, suggesting that BDNF  
67 unmasks these ‘silent’ neurons and causes them to become spontaneously active. We next investigated  
68 the role of gap junctions in mediating the  $[\text{Ca}^{2+}]_i$  fluctuations; application of the gap junction blocker  
69 octanol to chronic BDNF-treated neurons revealed a subpopulation of neurons that generate low-  
70 frequency, large  $[\text{Ca}^{2+}]_i$  fluctuations. Further pharmacological experiments indicated the  $[\text{Ca}^{2+}]_i$   
71 fluctuations in active neurons are regulated by diverse mechanisms including voltage-gated calcium and  
72 sodium channels as well as GABA and NMDA receptors. Finally, we used FIBSI to reanalyze a previous  
73 dataset of spontaneous excitatory postsynaptic current (sEPSC) recordings from BDNF-treated dorsal  
74 horn neurons in order to qualitatively compare the effects of BDNF on the sEPSCs and  $[\text{Ca}^{2+}]_i$

75 fluctuations in SDH neurons. The depressive effects of BDNF on the sEPSCs in delay and tonic-firing  
76 SDH neurons were consistent with the effects on the  $[Ca^{2+}]_i$  fluctuations. This study reveals novel  
77 mechanisms of BDNF regulation of dorsal horn excitability, which has implications for the study of chronic  
78 neuropathic pain physiology.

79

## 80 **Results**

### 81 **Chronic BDNF treatment of spinal organotypic cultures simultaneously depresses and unmasks** 82 **$[Ca^{2+}]_i$ fluctuations in superficial dorsal horn neurons**

83 In previous work we identified that chronic BDNF treatment (200 ng/ml, 5-6 days) induces fluctuations  
84 compared to naïve cultures (20,22). In this study, we performed a detailed quantitative analysis of the  
85 fluctuations in  $[Ca^{2+}]_i$  using Fluo-4 AM  $Ca^{2+}$  imaging and the FIBSI analysis program (21) to further  
86 establish the nature of BDNF-induced changes in lamina II neurons of the SDH. Refer to **Fig 1A1-A3** for  
87 an example of  $[Ca^{2+}]_i$  fluctuations detected by the FIBSI program. Inspection of the FIBSI-processed  
88 recordings revealed a subset of naïve, untreated neurons were 'silent' (**Fig 1B**, left) for the duration of  
89 the recording with notably smaller amplitudes ('silent' =  $1.7 \pm 0.04$  AU; naïve =  $53.7 \pm 1.6$  AU; BDNF =  
90  $25.5 \pm 0.7$  AU). No 'silent' neurons were found in the BDNF treatment group (**Fig 1B**, right). Refer to  
91 **Table 1** for detailed statistical information. This stark contrast suggested BDNF may be unmasking, or  
92 activating, these 'silent' neurons. We grouped the fluctuations in the 'silent' neurons together for further  
93 comparison to the fluctuations in the other active naïve neurons and BDNF-treated neurons. Log-  
94 transformed fluctuation amplitudes (**Fig 1C**) and area under the curve (AUC; **Fig 1D**) were larger in the  
95 naïve and BDNF conditions compared to 'silent'. Unexpectedly, both measures were significantly  
96 decreased in the BDNF condition compared to untreated. A plausible explanation for this effect was that  
97 chronic BDNF induced a concomitant enhancement of  $[Ca^{2+}]_i$  fluctuations in some neurons and  
98 depression in others. Indeed, the effects of BDNF on the relative frequencies (%) for the fluctuation  
99 amplitudes (amplitudes were normalized to the largest fluctuation in each neuron) revealed a biphasic  
100 effect; frequencies of the smaller- and larger-amplitude fluctuations were greater in the BDNF-treated  
101 neurons compared to the naïve and 'silent' neurons (**Fig 1E**). We next compared the mean parameters  
102 between neurons in order to control for differences in sampling periods. A <10% maximal fluctuation  
103 amplitude cut-off was applied to each neuron to reduce the effects of low-amplitude noise. As expected,  
104 nonparametric comparisons indicated that fluctuation amplitude (**Fig 1F**) and AUC (**Fig 1G**) were both  
105 greater in the naïve and BDNF-treated neurons compared to the 'silent' neurons, but were not significantly  
106 different between naïve and BDNF-treated neurons. Further analysis of the fluctuation kinetics indicated  
107 no effect on duration (**Fig 1H**), a modest, but significant decrease in rise time (i.e., peak time is more  
108 negative) compared to the 'silent' neurons (**Fig 1I**), and no effect on frequency (**Fig 1J**).

109

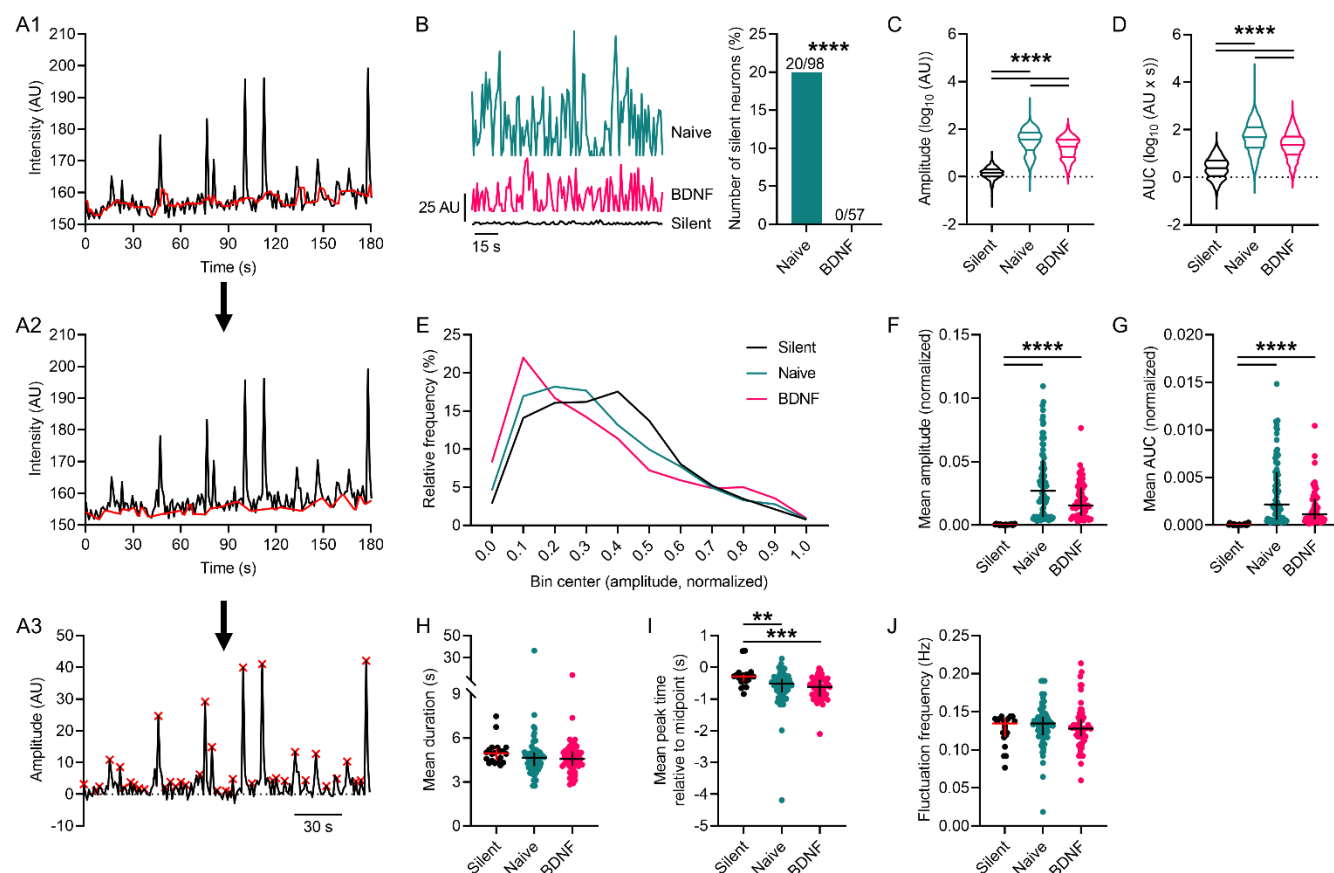

110

111 **Figure 1.** BDNF-induced fluctuations of  $[Ca^{2+}]_i$  in superficial dorsal horn neurons. **(A1-A3)** Example  
 112 recording  $[Ca^{2+}]_i$  fluctuations sampled in a SDH neuron and the processing steps used by the FIBSI  
 113 event-detection program. The running median (red line in A1, window =  $\sim 5$  s) was calculated based on  
 114 the raw amplitude (AU) and time coordinate data, then the peaks below the running median were traced  
 115 to form a reference line (red line in A2), and then the Ramer-Douglas-Peucker algorithm detected  
 116 waveforms above the reference (red x at event peaks). **(B)** Left: Examples of  $[Ca^{2+}]_i$  activity detected by  
 117 FIBSI in 3 different neurons. Right: The proportion of 'silent' neurons in the BDNF-treatment condition  
 118 was significantly reduced compared to the naïve condition. Proportions were compared using a Fisher  
 119 exact test. **(C-D)** Violin plots of the log-transformed values for fluctuation amplitude and AUC. Fluctuation  
 120 amplitudes and AUC were significantly increased in naïve and BDNF-treated neurons compared to the  
 121 'silent' neurons, while both measures in the BDNF-treated neurons were significantly reduced compared  
 122 to naïve. Neurons sampled: 'silent'  $n = 20$  (849 fluctuations), naïve  $n = 78$  (2651 fluctuations), and BDNF  
 123  $n = 57$  (1555 fluctuations). Median with quartiles shown. Comparisons made using Brown-Forsythe and  
 124 Welch's ANOVA tests and Games-Howell post-hoc test. **(E)** Relative frequency (%) of the fluctuations  
 125 binned by amplitude. Amplitude values were normalized to the largest fluctuation in each neuron. **(F-G)**

126 The mean fluctuation amplitude and AUC in the naïve and BDNF-treated neurons were significantly  
127 increased compared to the 'silent' neurons. **(H-J)** Further analysis revealed little to no effect of BDNF on  
128 fluctuation duration or frequency, but the fluctuations in 'silent' neurons exhibited longer rise times. For  
129 scatterplots F-J, the fluctuations that were <10% the maximal fluctuation amplitude in each neuron were  
130 omitted to reduce the effects of low-amplitude noise. Scatterplots in F-J show the median with the  
131 interquartile range. All comparisons of medians in F-K were made using Kruskal-Wallis tests and Dunn's  
132 post-hoc test.  $**P < 0.01$ ,  $***P < 0.001$ ,  $****P < 0.0001$ .

| Figure      | Test                                                                                                                                                                                                                                                                                                                                                                                                                                                                                                                                                                                                                                                                                                                                                               | Post-hoc comparisons                                                                                                             | Figure      | Test                                                          | Post-hoc comparisons                                                                                                   |
|-------------|--------------------------------------------------------------------------------------------------------------------------------------------------------------------------------------------------------------------------------------------------------------------------------------------------------------------------------------------------------------------------------------------------------------------------------------------------------------------------------------------------------------------------------------------------------------------------------------------------------------------------------------------------------------------------------------------------------------------------------------------------------------------|----------------------------------------------------------------------------------------------------------------------------------|-------------|---------------------------------------------------------------|------------------------------------------------------------------------------------------------------------------------|
| <b>1B</b>   | Fisher exact test<br>Naïve vs BDNF: P < 0.0001                                                                                                                                                                                                                                                                                                                                                                                                                                                                                                                                                                                                                                                                                                                     | n/a                                                                                                                              | <b>5C2</b>  | Brown-Forsythe<br>F <sub>(3, 2916)</sub> = 311.1, P < 0.0001  | Games-Howell's multiple comparison test<br>Control vs BDNF (Delay): P = 0.4264;<br>Control vs BDNF (Tonic): P < 0.0001 |
| <b>1C</b>   | Brown-Forsythe<br>F <sub>(2, 4598)</sub> = 3373, P < 0.0001<br>Welch's ANOVA<br>W <sub>(2, 2892)</sub> = 5458, P < 0.0001                                                                                                                                                                                                                                                                                                                                                                                                                                                                                                                                                                                                                                          | Games-Howell's multiple comparison test<br>Silent vs naïve: P < 0.0001; silent vs BDNF:<br>P < 0.0001; naïve vs BDNF: P < 0.0001 |             | Welch's ANOVA<br>W <sub>(3, 2862)</sub> = 504.2, P < 0.0001   |                                                                                                                        |
| <b>1D</b>   | Brown-Forsythe<br>F <sub>(2, 4280)</sub> = 1737, P < 0.0001<br>Welch's ANOVA<br>W <sub>(2, 2502)</sub> = 2032, P < 0.0001                                                                                                                                                                                                                                                                                                                                                                                                                                                                                                                                                                                                                                          | Games-Howell's multiple comparison test<br>Silent vs naïve: P < 0.0001; silent vs BDNF:<br>P < 0.0001; naïve vs BDNF: P < 0.0001 | <b>5D2</b>  | Brown-Forsythe<br>F <sub>(3, 1761)</sub> = 419.3, P < 0.0001  | Games-Howell's multiple comparison test<br>Control vs BDNF (Delay): P < 0.0001;<br>Control vs BDNF (Tonic): P < 0.0001 |
| <b>1F</b>   | Kruskal-Wallis test<br>KW = 54.23, P < 0.0001                                                                                                                                                                                                                                                                                                                                                                                                                                                                                                                                                                                                                                                                                                                      | Dunn's multiple comparison test<br>Silent vs naïve: P < 0.0001; silent vs BDNF:<br>P < 0.0001; naïve vs BDNF: P = 0.0939         |             | Welch's ANOVA<br>W <sub>(3, 2791)</sub> = 541.8, P < 0.0001   |                                                                                                                        |
| <b>1G</b>   | Kruskal-Wallis test<br>KW = 54.35, P < 0.0001                                                                                                                                                                                                                                                                                                                                                                                                                                                                                                                                                                                                                                                                                                                      | Dunn's multiple comparison test<br>Silent vs naïve: P < 0.0001; silent vs BDNF:<br>P < 0.0001; naïve vs BDNF: P = 0.0732         | <b>5E2</b>  | Brown-Forsythe<br>F <sub>(3, 2550)</sub> = 159.1, P < 0.0001  | Games-Howell's multiple comparison test<br>Control vs BDNF (Delay): P < 0.0001;<br>Control vs BDNF (Tonic): P = 0.0012 |
| <b>1H</b>   | Kruskal-Wallis test<br>KW = 4.507, P = 0.1051                                                                                                                                                                                                                                                                                                                                                                                                                                                                                                                                                                                                                                                                                                                      | n/a                                                                                                                              |             | Welch's ANOVA<br>W <sub>(3, 2759)</sub> = 162.3, P < 0.0001   |                                                                                                                        |
| <b>1I</b>   | Kruskal-Wallis test<br>KW = 15.04, P = 0.0005                                                                                                                                                                                                                                                                                                                                                                                                                                                                                                                                                                                                                                                                                                                      | Dunn's multiple comparison test<br>Silent vs naïve: P = 0.0087; silent vs BDNF:<br>P = 0.0003; naïve vs BDNF: P = 0.4002         | <b>5F2</b>  | Brown-Forsythe<br>F <sub>(3, 2027)</sub> = 14.5, P < 0.0001   | Games-Howell's multiple comparison test<br>Control vs BDNF (Delay): P = 0.1284;<br>Control vs BDNF (Tonic): P < 0.0001 |
| <b>1J</b>   | Kruskal-Wallis test<br>KW = 2.810, P = 0.2454                                                                                                                                                                                                                                                                                                                                                                                                                                                                                                                                                                                                                                                                                                                      | n/a                                                                                                                              |             | Welch's ANOVA<br>W <sub>(3, 2860)</sub> = 27.93, P < 0.0001   |                                                                                                                        |
| <b>2B</b>   | Two-way RM ANOVA<br>Interaction: F <sub>(1, 77)</sub> = 29.27, P < 0.0001, 10.65% total variation<br>Group effect: F <sub>(1, 77)</sub> = 0.0392, P = 0.8437, 0.028% total variation<br>Treatment effect: F <sub>(1, 77)</sub> = 14.31, P = 0.0003, 5.208% total variation<br>Subjects (matching) effect: F <sub>(77, 77)</sub> = 1.994, P = 0.0014, 55.89% total variation                                                                                                                                                                                                                                                                                                                                                                                        | Sidak's multiple comparison test<br>Control vs octanol (Decrease): P = 0.4469;<br>Control vs octanol (Increase): P < 0.0001      | <b>S3A2</b> | Brown-Forsythe<br>F <sub>(3, 71793)</sub> = 1122, P < 0.0001  | Games-Howell's multiple comparison test<br>Control vs BDNF (Delay): P < 0.0001;<br>Control vs BDNF (Tonic): P < 0.0001 |
| <b>2C</b>   | Two-way RM ANOVA<br>Interaction: F <sub>(1, 77)</sub> = 13.95, P = 0.0004, 7.126% total variation<br>Group effect: F <sub>(1, 77)</sub> = 7.287, P = 0.0085, 4.105% total variation<br>Treatment effect: F <sub>(1, 77)</sub> = 11.50, P = 0.0011, 5.875% total variation<br>Subjects (matching) effect: F <sub>(77, 77)</sub> = 1.102, P = 0.3349, 43.38% total variation                                                                                                                                                                                                                                                                                                                                                                                         | Sidak's multiple comparison test<br>Control vs octanol (Decrease): P = 0.9638;<br>Control vs octanol (Increase): P < 0.0001      | <b>S3A4</b> | Brown-Forsythe<br>F <sub>(3, 29988)</sub> = 851.4, P < 0.0001 | Games-Howell's multiple comparison test<br>Control vs BDNF (Delay): P < 0.0001;<br>Control vs BDNF (Tonic): P < 0.0001 |
| <b>2D</b>   | Two-way RM ANOVA<br>Interaction: F <sub>(1, 77)</sub> = 13.63, P = 0.0004, 7.764% total variation<br>Group effect: F <sub>(1, 77)</sub> = 0.080, P = 0.7780, 0.049% total variation<br>Treatment effect: F <sub>(1, 77)</sub> = 1.725, P = 0.1929, 0.983% total variation<br>Subjects (matching) effect: F <sub>(77, 77)</sub> = 1.078, P = 0.3709, 47.28% total variation                                                                                                                                                                                                                                                                                                                                                                                         | Sidak's multiple comparison test<br>Control vs octanol (Decrease): P = 0.1876;<br>Control vs octanol (Increase): P = 0.0013      | <b>S3B2</b> | Brown-Forsythe<br>F <sub>(3, 55836)</sub> = 870.5, P < 0.0001 | Games-Howell's multiple comparison test<br>Control vs BDNF (Delay): P < 0.0001;<br>Control vs BDNF (Tonic): P < 0.0001 |
| <b>3B</b>   | Mann-Whitney test<br>U = 606.5, P = 0.0010                                                                                                                                                                                                                                                                                                                                                                                                                                                                                                                                                                                                                                                                                                                         | n/a                                                                                                                              |             | Welch's ANOVA<br>W <sub>(3, 54028)</sub> = 850.3, P < 0.0001  |                                                                                                                        |
| <b>3C1</b>  | Wilcoxon matched-pairs signed rank test<br>W = -1373, P < 0.0001                                                                                                                                                                                                                                                                                                                                                                                                                                                                                                                                                                                                                                                                                                   | n/a                                                                                                                              | <b>S3B4</b> | Brown-Forsythe<br>F <sub>(3, 22611)</sub> = 438.9, P < 0.0001 | Games-Howell's multiple comparison test<br>Control vs BDNF (Delay): P < 0.0001;<br>Control vs BDNF (Tonic): P < 0.0001 |
| <b>3C2</b>  | Two-way RM ANOVA<br>Interaction: F <sub>(1, 58)</sub> = 37.70, P < 0.0001, 6.086% total variation<br>Group effect: F <sub>(1, 58)</sub> = 38.23, P < 0.0001, 29.22% total variation<br>Treatment effect: F <sub>(1, 58)</sub> = 83.93, P < 0.0001, 13.55% total variation<br>Subjects (matching) effect: F <sub>(58, 58)</sub> = 4.736, P < 0.0001, 44.34% total variation                                                                                                                                                                                                                                                                                                                                                                                         | Sidak's multiple comparison test<br>Control vs octanol (Decrease): P < 0.0001;<br>Control vs octanol (Increase): P = 0.0450      | <b>S3C2</b> | Brown-Forsythe<br>W <sub>(3, 17638)</sub> = 1298, P < 0.0001  | Games-Howell's multiple comparison test<br>Control vs BDNF (Delay): P < 0.0001;<br>Control vs BDNF (Tonic): P < 0.0001 |
| <b>4A-B</b> | Paired t tests<br>Control vs 0 Ca <sup>2+</sup> : Amplitude P > 0.05; Frequency P > 0.05<br>Control vs Cd <sup>2+</sup> : Amplitude P > 0.05; Frequency P > 0.05<br>Control vs Ni <sup>2+</sup> : Amplitude P > 0.05; Frequency P < 0.001<br>Control vs nitrendipine: Amplitude P > 0.05; Frequency P < 0.001<br>Control vs ω-conotoxin: Amplitude P > 0.05; Frequency P < 0.001<br>Control vs TTX: Amplitude P > 0.05; Frequency P > 0.05<br>Control vs riluzole: Amplitude P > 0.05; Frequency P < 0.001<br>Control vs NBQX: Amplitude P > 0.05; Frequency P > 0.05<br>Control vs D-AP5: Amplitude P < 0.001; Frequency P > 0.05<br>Control vs kynurenic acid: Amplitude P > 0.05; Frequency P > 0.05<br>Control vs GABA: Amplitude P > 0.05; Frequency P > 0.05 | n/a                                                                                                                              | <b>S3C4</b> | Brown-Forsythe<br>F <sub>(3, 26038)</sub> = 26.33, P < 0.0001 | Games-Howell's multiple comparison test<br>Control vs BDNF (Delay): P = 0.0062;<br>Control vs BDNF (Tonic): P = 0.6416 |
|             |                                                                                                                                                                                                                                                                                                                                                                                                                                                                                                                                                                                                                                                                                                                                                                    |                                                                                                                                  |             | Welch's ANOVA<br>W <sub>(3, 14707)</sub> = 27.89, P < 0.0001  |                                                                                                                        |
|             |                                                                                                                                                                                                                                                                                                                                                                                                                                                                                                                                                                                                                                                                                                                                                                    |                                                                                                                                  | <b>S3D2</b> | Brown-Forsythe<br>F <sub>(3, 76383)</sub> = 171.1, P < 0.0001 | Games-Howell's multiple comparison test<br>Control vs BDNF (Delay): P < 0.0001;<br>Control vs BDNF (Tonic): P < 0.0001 |
|             |                                                                                                                                                                                                                                                                                                                                                                                                                                                                                                                                                                                                                                                                                                                                                                    |                                                                                                                                  |             | Welch's ANOVA<br>W <sub>(3, 51987)</sub> = 167.3, P < 0.0001  |                                                                                                                        |
|             |                                                                                                                                                                                                                                                                                                                                                                                                                                                                                                                                                                                                                                                                                                                                                                    |                                                                                                                                  | <b>S3D4</b> | Brown-Forsythe<br>F <sub>(3, 26111)</sub> = 62.09, P < 0.0001 | Games-Howell's multiple comparison test<br>Control vs BDNF (Delay): P < 0.0001;<br>Control vs BDNF (Tonic): P < 0.0001 |
|             |                                                                                                                                                                                                                                                                                                                                                                                                                                                                                                                                                                                                                                                                                                                                                                    |                                                                                                                                  |             | Welch's ANOVA<br>W <sub>(3, 16008)</sub> = 62.78, P < 0.0001  |                                                                                                                        |

134 **Table 1.** Detailed results of statistical analysis per figure.



135 **Octanol, a gap junction blocker, disinhibits a population of superficial dorsal horn neurons in**  
136 **BDNF-treated cultures**

137 It has been shown that gap junctions have regulatory control over network activity in the *substantia*  
138 *gelatinosa* (23–26). Therefore, gap junctions may play a role in regulating the properties of  $[Ca^{2+}]_i$  across  
139 the network, but the response of individual neurons to the chronic BDNF in the culture may be masked  
140 by the complex responses of the different types of neurons to BDNF (20,27). To address this and  
141 determine the potential role of gap junctions in mediating the BDNF-induced fluctuations, we recorded  
142  $[Ca^{2+}]_i$  from SDH neurons exposed to chronic BDNF and then applied a non-specific gap junction blocker  
143 octanol at 1mM for  $\geq 3$  min. We again performed a detailed analysis using the FIBSI program and a  $< 10\%$   
144 maximal fluctuation amplitude cut-off was applied to each neuron. Inspection of the FIBSI-processed  
145 recordings revealed octanol disproportionately affected some neurons compared to others (i.e., large  
146 increases in amplitude and AUC in some neurons vs minor decreases in others). Neurons were grouped  
147 based on whether the octanol treatment caused a negative (decrease,  $n = 39$ ) or positive (increase,  $n =$   
148  $40$ ) fold change in mean fluctuation amplitude compared to the BDNF (control) condition (**Fig 2A**). Paired  
149 analyses indicated blocking gap junctions with octanol decreased the frequency of the BDNF-induced  
150 fluctuations (**Fig 2B**) while increasing their duration (**Fig 2C**) only in the neurons that had a positive fold  
151 change in mean fluctuation amplitude. Fluctuation rise time was also significantly decreased in the same  
152 group of neurons (**Fig 2D**). These data suggest that blocking gap junctions with octanol selectively  
153 disinhibited the response to chronic BDNF in a subpopulation of SDH neurons.

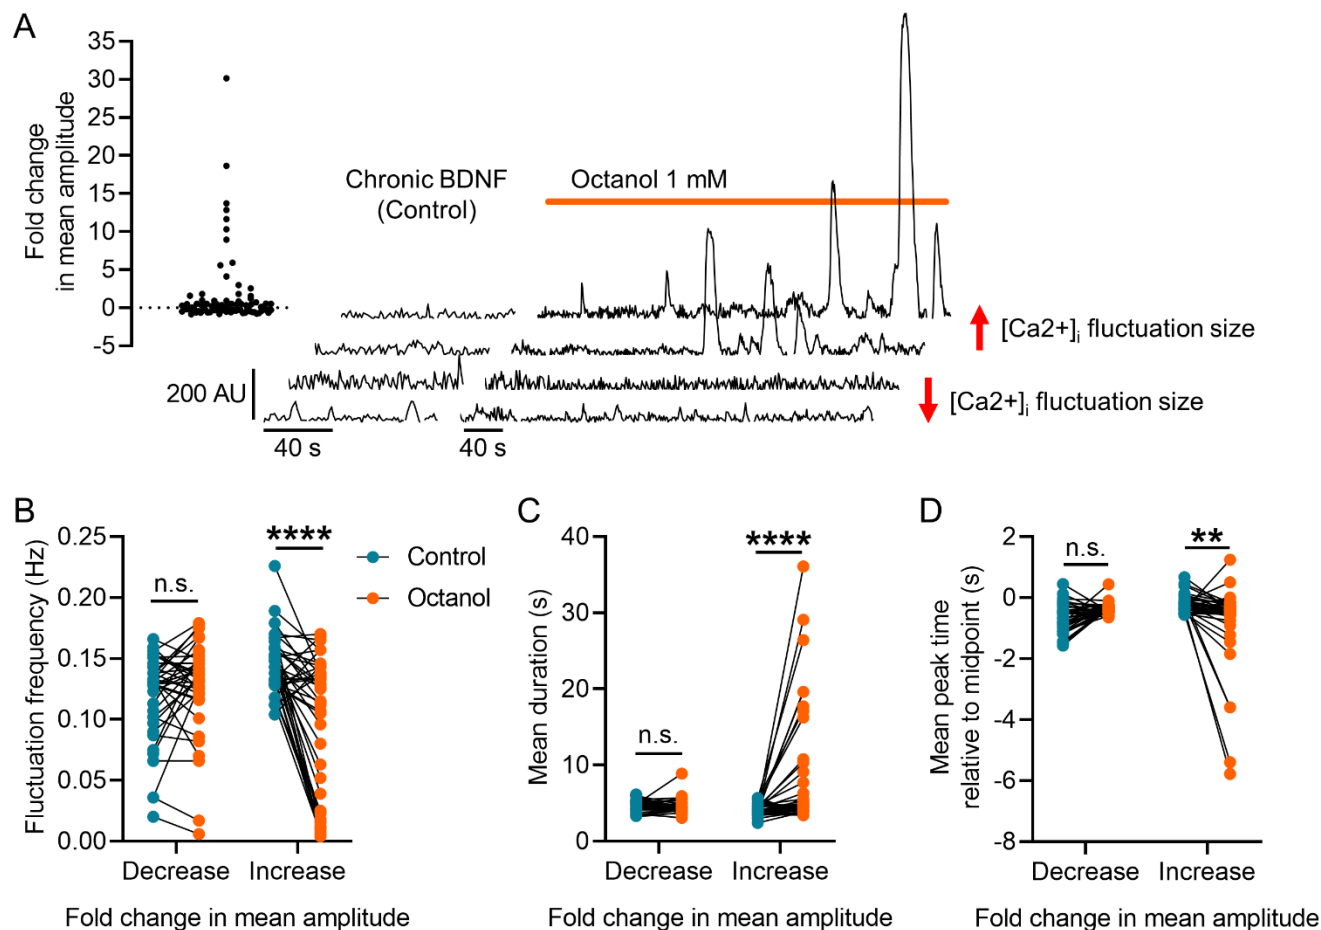

154

155 **Figure 2.** Effect of gap junction blocker octanol on BDNF-induced [Ca<sup>2+</sup>]<sub>i</sub> fluctuations. **(A)** Scatterplot  
 156 summarizing the effects of octanol on mean fluctuation amplitude and examples of FIBSI-processed  
 157 recordings. The two bottom recordings show a decrease in fluctuation amplitude and the two top show  
 158 an increase. **(B-D)** Neurons were sorted based on whether they exhibited a positive or negative fold  
 159 change in mean fluctuation amplitude in response to octanol. Paired analyses showed octanol selectively  
 160 and significantly decreased the mean fluctuation frequency, increased the mean fluctuation duration, and  
 161 decreased the mean fluctuation rise time (i.e., more negative peak time) in the neurons with positive fold  
 162 changes in mean fluctuation amplitude. Control vs octanol paired comparisons for the groups in B-D were  
 163 made using two-way repeated measures ANOVAs and Sidak's post-hoc test. \*\**P* < 0.01, \*\*\*\**P* < 0.0001.

164

165

166 **Chronic BDNF induces synchrony of [Ca<sup>2+</sup>]<sub>i</sub> fluctuations in organotypic cultures, and blocking**  
 167 **gap junctions reduces BDNF-induced synchrony**

168 Previous work has shown BDNF-treated SDH neurons generate synchronous [Ca<sup>2+</sup>]<sub>i</sub> fluctuations (20).  
 169 We verified that finding by using the FIBSI-processed recordings and comparing the degree of synchrony

170 between neurons imaged together in naïve and BDNF-treated cultures. Adjacency matrixes were  
 171 generated using Pearson  $r$  coefficients; the recording of each neuron was correlated with every other  
 172 neuron imaged within the same naïve or BDNF-treated culture using a Pearson correlation matrix. The  
 173 adjacency matrixes for the BDNF-treated cultures showed the neurons were more positively correlated  
 174 with Pearson  $r$  coefficients closer to 1 (**Fig 3A**), suggesting they exhibited more synchronous  $[Ca^{2+}]_i$   
 175 fluctuations than the naïve cultures. To confirm this prediction, the mean coefficient for each neuron was  
 176 calculated (i.e., the mean correlation of each neuron with every other neuron in its respective culture;  
 177 refer to Fig 3A for Fisher Z transformation steps). Comparison of the mean Pearson  $r$  coefficients revealed  
 178 BDNF-treated neurons were more positively correlated with other neurons in the culture than naïve  
 179 neurons (**Fig 3B**). Considering the role gap junctions may play in regulating network activity and  
 180 synchronous activity, this result led us to anticipate that blocking gap junctions may reduce BDNF-  
 181 induced synchrony within the culture. We used the same approach to measure synchrony among  
 182 neurons within the same cultures treated with BDNF prior to application of octanol, and then we asked  
 183 whether blocking gap junctions caused a decrease in the mean Pearson  $r$  coefficients. Indeed, octanol  
 184 caused a net decrease in the mean Pearson  $r$  coefficient (**Fig 3C1-2**). Closer inspection revealed octanol  
 185 decreased the mean Pearson  $r$  coefficient in 100% (25/25) of the neurons in the group with decreased  
 186 fluctuation amplitudes, while only 63% (22/35) of the neurons in the group with increased fluctuation  
 187 amplitudes exhibited a decreased mean Pearson  $r$  coefficient. This suggests that blocking gap junctions  
 188 may actually increase  $[Ca^{2+}]_i$  fluctuation synchrony in some neurons.

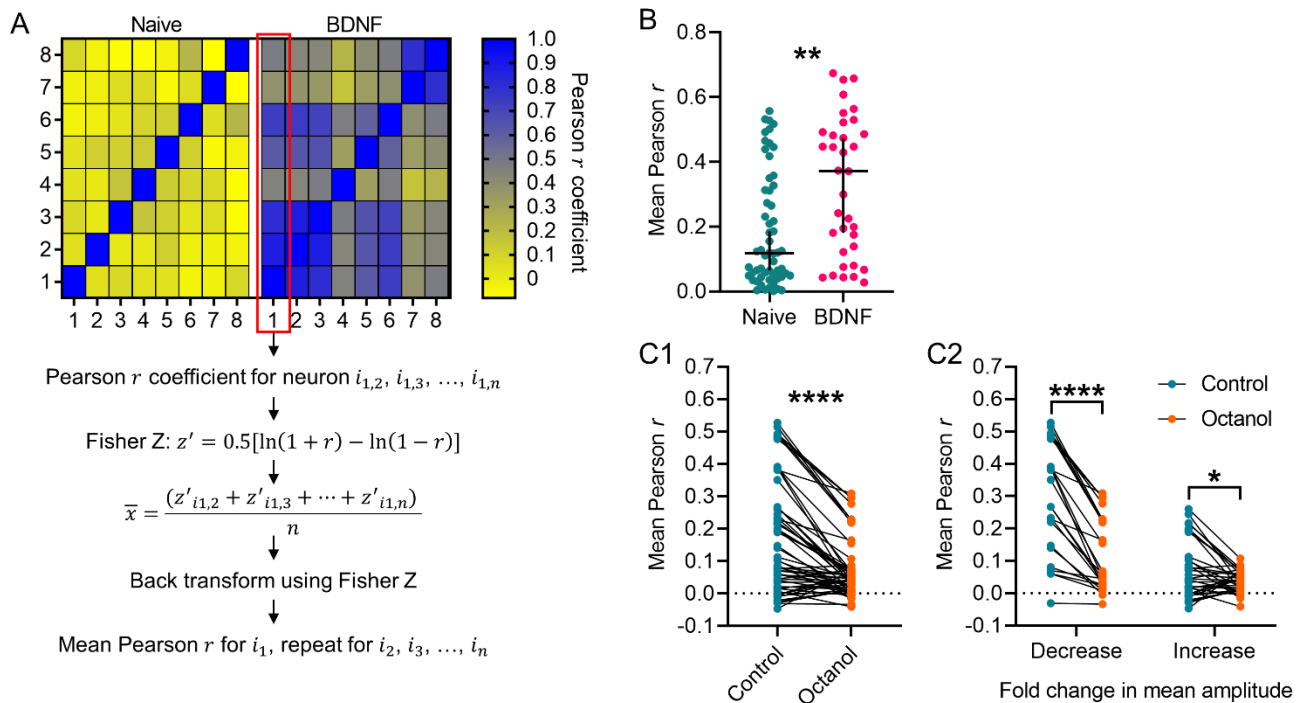

189

190 **Figure 3.** Synchrony of  $[Ca^{2+}]_i$  fluctuations in BDNF-treated cultures and the effect of octanol. **(A)**  
191 Example adjacency matrix constructed from Pearson  $r$  coefficients corresponding to the correlation in  
192 activity between neurons in a naïve or BDNF-treated culture, each with 8 sampled neurons. Steps to  
193 calculate the mean Pearson  $r$  for each neuron within a culture using the Fisher Z transformation are also  
194 depicted. **(B)** Neurons sampled from BDNF-treated cultures exhibited significantly greater mean Pearson  
195  $r$  coefficients compared to neurons sampled from naïve cultures. Neurons were imaged from 4 naïve  
196 cultures and 3 BDNF-treated cultures, each with  $\geq 8$  neurons imaged. Medians shown with the 95%  
197 confidence interval. Medians were compared using a Mann-Whitney test. **(C1-C2)** Treatment with octanol  
198 significantly decreased the mean Pearson  $r$  in neurons sampled from cultures exposed to chronic BDNF,  
199 and this treatment effect impacted both subsets of neurons binned based on their initial response to  
200 octanol. Neurons were imaged from 4 cultures. The control vs octanol paired comparison in C1 was made  
201 using a Wilcoxon rank sum test. Control vs octanol paired comparisons for the groups in C2 were made  
202 using a measures two-way repeated measures ANOVA and Sidak's post-hoc test. \* $P < 0.05$ , \*\* $P < 0.01$ ,  
203 \*\*\*\* $P < 0.0001$ .

204  
205  
206 **Pharmacology of  $[Ca^{2+}]_i$  fluctuations in BDNF-treated slices**

207 In order to further characterize the properties of the  $[Ca^{2+}]_i$  fluctuations, we used pharmacological  
208 treatments to block a variety of voltage-gated ion channels, glutamate receptors, and GABA receptors.  
209 Comparisons between the pharmacologically-treated neurons and the BDNF-treated (control) neurons  
210 revealed the  $[Ca^{2+}]_i$  fluctuation amplitudes (**Fig 4A**) and frequency (**Fig 4B**) are controlled by diverse  
211 mechanisms (example recordings and data available in **Supplemental Figure 1**). The fluctuations were  
212 ablated when extracellular  $Ca^{2+}$  was removed, when all voltage-gated calcium channels (VGCCs) were  
213 blocked with  $Cd^{2+}$ , when all TTX-sensitive voltage-gated sodium channels (VGSCs) were blocked with  
214 tetrodotoxin (TTX), when AMPA or kainite glutamate receptors were blocked, and when GABA was  
215 applied to the cultures. Interestingly, the fluctuations remained when we blocked T-type (with  $Ni^{2+}$ ), L-  
216 type (with nitrendipine), or N-type (with  $\omega$ -conotoxin)  $Ca^{2+}$  channels, although the frequency was  
217 significantly reduced with no effect on amplitude. Riluzole, which blocks glutamate release and VGSCs,  
218 only affected the fluctuation frequency but not amplitude. Finally, the NMDA blocker D-AP5 was the only  
219 blocker to significantly reduce fluctuation amplitudes, but it had no effect on frequency. These data  
220 suggest the BDNF-induced  $[Ca^{2+}]_i$  fluctuations are controlled by a combination of VGCCs, TTX-sensitive  
221 VGSCs, GABA and NMDA receptors.

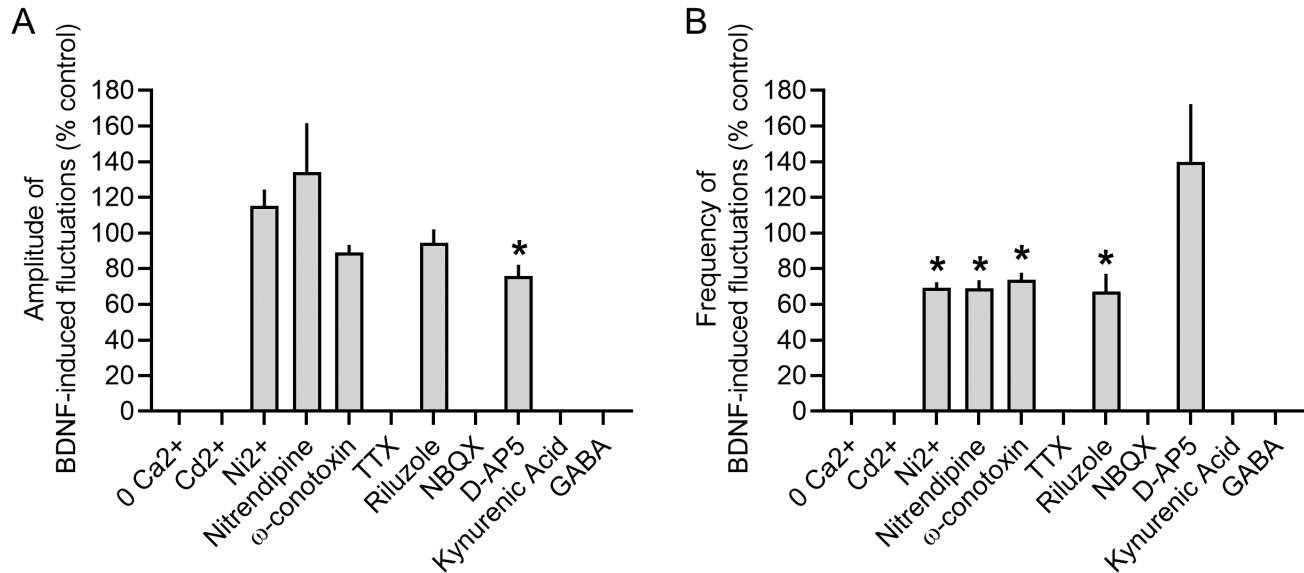

222

223 **Figure 4.** Pharmacology of [Ca<sup>2+</sup>]<sub>i</sub> fluctuations from BDNF-treated cultures. Summary of the effects of  
224 various pharmacological treatments on the (A) amplitude and (B) frequency of the [Ca<sup>2+</sup>]<sub>i</sub> fluctuations in  
225 BDNF-treated cultures compared to before drug treatment. Bars show the mean + standard error of the  
226 mean. \**P* < 0.001, paired t-test, n = 5-20 cells per condition.

227

228

229 **Clustering spontaneous excitatory postsynaptic currents (sEPSCs) reveals chronic BDNF**  
230 **treatment depresses excitability of delay and tonic-firing superficial dorsal horn neurons,**  
231 **mirroring the effect of BDNF on [Ca<sup>2+</sup>]<sub>i</sub> fluctuations**

232 It is well established that BDNF release in the SDH is involved in neuropathic pain (10,16,17). However,  
233 to our knowledge our findings are the first to show chronic BDNF treatment unmasks [Ca<sup>2+</sup>]<sub>i</sub> fluctuations  
234 in a subpopulation of SDH neurons while depressing activity in others. We had previously shown that  
235 sEPSCs recorded from SDH neurons are perturbed in BDNF-treated spinal cord organotypic cultures  
236 (20). It is plausible that the newly discovered unmasked BDNF-induced [Ca<sup>2+</sup>]<sub>i</sub> fluctuations underlie  
237 changes in network excitability. We decided to readdress the effects of BDNF on network excitability by  
238 using the FIBSI program to quantitatively analyze a previous subset of sEPSC recordings in delay and  
239 tonic-firing SDH neurons (example recordings and low-pass filtering/matching methods are available in  
240 **Supplemental Figure 2**). Inspection of the sEPSC interevent interval data indicated there might be  
241 natural clustering between single “small” sEPSCs and larger summated sEPSCs. We used partitioning  
242 around medoids (a medoid is like a centroid, but is restricted to an actual observation in the dataset) to  
243 cluster the sEPSCs in each neuron based on 3 sEPSC parameters: interevent interval (ms), amplitude  
244 (pA), and charge transfer (Q; essentially area under the curve). Optimal clustering (k medoids = 3-5 per

245 neuron) identified 3 main clusters of sEPSCs that were present in all delay (**Fig 5A1-A2**) and tonic (**Fig**  
246 **5B1-B2**) neurons in both control and BDNF treatment conditions (clusters named based on amplitude;  
247 interevent interval): 1) small; short, 2) small; long, and 3) large. Two other clusters were identified (small;  
248 mid and medium), but they were not present in all neurons or treatment conditions and were not analyzed  
249 for this study. We were mainly interested in the effects of BDNF on the cluster of large-amplitude sEPSCs  
250 in both neuron types (refer to **Supplemental Figure 3** for the “small” sEPSC analysis). Chronic BDNF  
251 treatment significantly decreased sEPSC amplitudes (**Fig 5C1-C2**) and charge transfer (**Fig 5D1-D2**) in  
252 the tonic-firing neurons. We did not observe a significant effect on sEPSC amplitudes in the delay  
253 neurons, but charge transfer was significantly decreased. The sEPSCs in the BDNF-treated delay  
254 neurons were narrower (control duration =  $83.6 \pm 1.2$  ms; BDNF duration =  $49.9 \pm 0.4$  ms). The sEPSC  
255 interevent intervals were significantly shorter in both neuron types (**Fig 5E1-E2**), and peak time  
256 measurements indicated BDNF significantly increased activation of the sEPSCs in the tonic neuron (**Fig**  
257 **5F1-F2**).

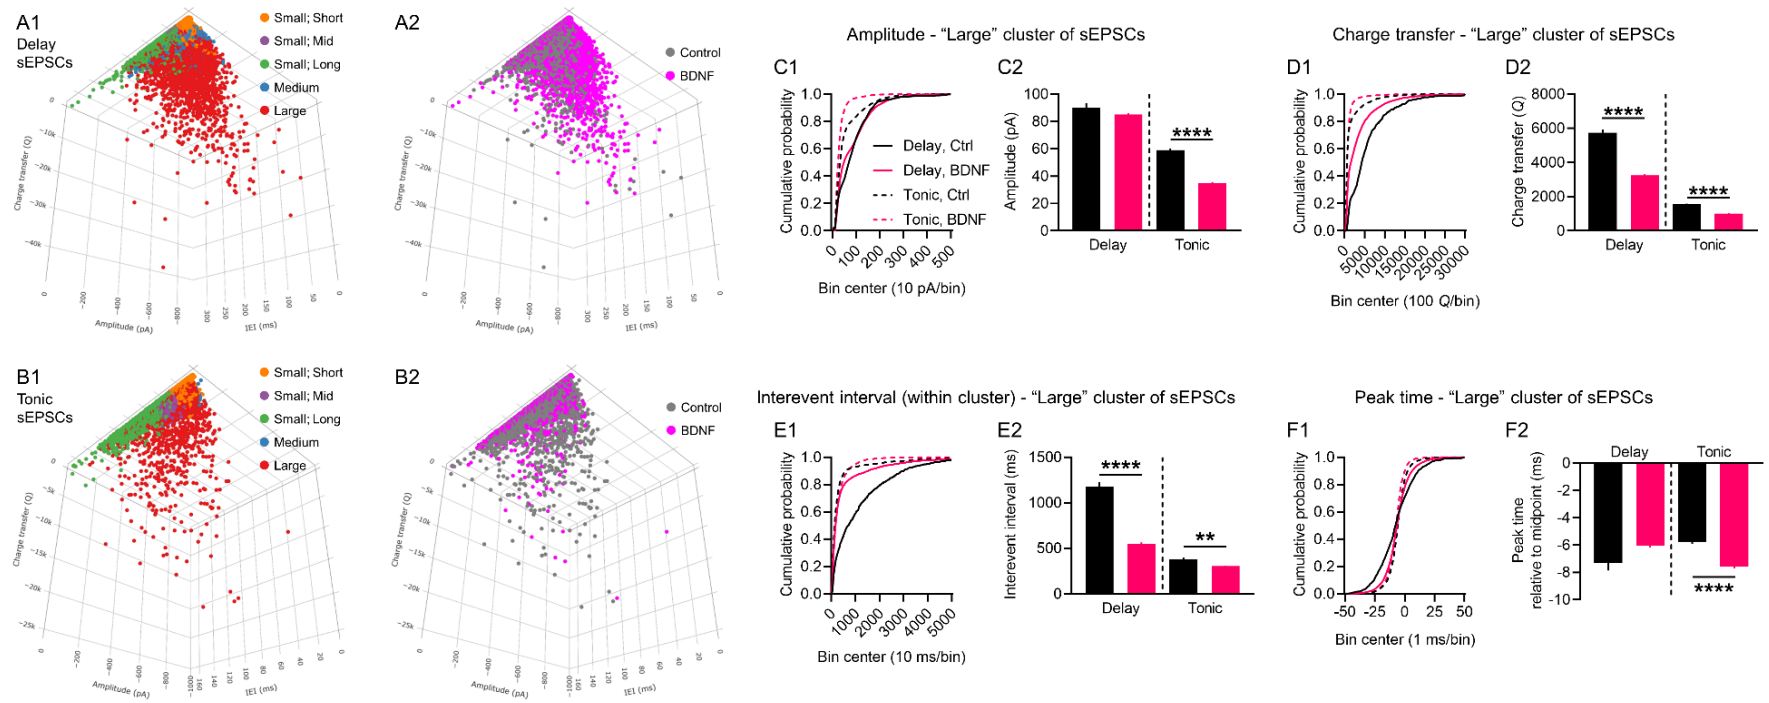

258

259 **Figure 5.** Cluster analysis of spontaneous EPSCs in delay and tonic-firing superficial dorsal horn neurons. Three dimensional  
 260 representations of the sEPSCs in **(A1-A2)** delay neurons and **(B1-B2)** tonic neurons plotted based on interevent interval (x-axis),  
 261 amplitude (y-axis), and charge transfer (z-axis). Mapping of the clustering results and treatment shown for the total sample of sEPSCs.  
 262 The sEPSCs in each neuron were clustered independently from the other neurons. Optimal partitioning around medoids identified 3  
 263 primary clusters present in all neurons in both treatment conditions (naming based on amplitude; interevent interval): small; short,  
 264 small; long, and large. Two additional clusters were identified in some neurons, but were not present in all neurons in both conditions:  
 265 small; mid and medium. Neurons sampled: 19 delay (5 control, 14 BDNF); 9 tonic (5 control, 4 BDNF). Total number of sEPSCs: 33,206  
 266 in delay, control; 108261 in delay, BDNF; 40658 in tonic, control; 36521 in tonic, BDNF. The effects of BDNF on sEPSC amplitude,  
 267 charge transfer (i.e., area under the curve), and peak time were assessed for the 3 primary clusters (large cluster shown, refer to  
 268 Supplemental Figure 3 for the two small-amplitude clusters). **(C1-C2)** Treatment with BDNF significantly decreased sEPSC amplitudes  
 269 in tonic neurons, but a significant effect was not observed in the delay neurons. Cumulative distributions of the measured amplitudes



270 shown (left) alongside the means  $\pm$  standard error of the means (right). **(D1-D2)** The BDNF treatment  
271 significantly reduced sEPSC charge transfer measures in both delay and tonic neurons. **(E1-E2)**  
272 Interevent intervals for the sEPSCs within the large cluster were significantly decreased in the BDNF-  
273 treated neurons. **(F1-F2)** The sEPSC activation kinetics were significantly faster in the BDNF-treated  
274 neurons, but no significant effect was observed for the sEPSCs in the delay neurons. Large sEPSC  
275 cluster sample sizes: delay neurons control  $n = 753$ , BDNF  $n = 4539$ ; tonic neurons control  $n = 2348$ ,  
276 BDNF  $n = 2367$ . Comparisons between means were made using Brown-Forsythe and Welch's ANOVA  
277 tests and Games-Howell post-hoc test.  $**P < 0.01$ ,  $****P < 0.0001$ .

278

279

## 280 Discussion

281 The present study was undertaken to better understand mechanisms underlying synchronous activity  
282 among SDH neurons and the influence BDNF may have on network excitability in naïve, uninjured  
283 organotypic cultures. Our experiments indicate long-term exposure to BDNF produces a complex set of  
284 neuron-dependent changes in network excitability in the SDH. First, BDNF causes a concomitant  
285 activation of  $\text{Ca}^{2+}$  signaling in a subpopulation of 'silent' SDH neurons (~20% sampled) and depression  
286 of  $\text{Ca}^{2+}$  signaling in many others. This finding was largely unexpected as we have previously shown  
287 chronic BDNF increases the size and frequency of  $[\text{Ca}^{2+}]_i$  fluctuations (20). It is plausible that the  
288 presence of the 'silent' neurons can greatly influence data analysis and interpretation depending on how  
289 they are grouped together, or discarded. Another possibility is that resolution differences between the  
290 two event-detection programs used (FIBSI in the current study, Mini Analysis Software (Synaptosoft, NJ))  
291 in the previous study) could influence analysis of the  $[\text{Ca}^{2+}]_i$  fluctuations. However, the goal of the present  
292 study was not to compare/contrast the two programs. The second significant finding was that gap junction  
293 signaling may play a crucial role in regulating BDNF-induced changes in  $\text{Ca}^{2+}$  signaling in the SDH.  
294 Blockade of gap junctions with octanol unveiled a subpopulation of neurons that respond to BDNF with  
295 large-amplitude, low-frequency  $[\text{Ca}^{2+}]_i$  fluctuations. This finding suggests that gap junctions modulate  
296 global network activity, either by directly or indirectly inhibiting those particular neurons with increased  
297  $\text{Ca}^{2+}$  signaling. Indeed, this is supported by the third major finding that BDNF profoundly increases  
298 synchrony of the  $[\text{Ca}^{2+}]_i$  fluctuations, and blocking gap junctions with octanol reverses BDNF-induced  
299 synchrony.

300

301 While the physiological correlates of the BDNF-related  $[\text{Ca}^{2+}]_i$  fluctuations are unclear, we do not think  
302 they are being driven by delay or tonic-firing neurons in the SDH. Unlike our analysis of the  $[\text{Ca}^{2+}]_i$   
303 fluctuations where we describe the 'silent' neurons, we did not observe any unmasking effect(s) of BDNF



304 on the sEPSCs in the delay or tonic neurons. All neurons sampled in the control (naïve) condition  
305 generated visually appreciable, large-amplitude sEPSCs. The main depressive effect of BDNF on the  
306 sEPSCs (refer also to **Supplemental Figure 3**) mirrored the main effect of BDNF on comparable  
307 properties for the  $[Ca^{2+}]_i$  fluctuations. A summary of each dataset (**Fig 6**, table) shows BDNF reduced  
308 the amplitude and area under the curve parameters for the  $[Ca^{2+}]_i$  fluctuations and large sEPSCs. More  
309 nuanced effects were observed for frequency (reciprocal of interevent interval) and activation kinetics:  
310 BDNF increased the frequency of the large sEPSCs but had little to no effect on the frequency of the  
311  $[Ca^{2+}]_i$  fluctuations; BDNF increased activation of the large sEPSCs in the tonic neurons and had little to  
312 no effect on the delay neurons or  $[Ca^{2+}]_i$  fluctuations. However, these data collectively suggest chronic  
313 BDNF may have reduced excitability in the delay and tonic SDH neurons, and this may provide a  
314 physiological basis for the depressive effect of chronic BDNF on the  $[Ca^{2+}]_i$  fluctuations. On the contrary,  
315 the 'silent' neurons are predicted to have responded to chronic BDNF with  $[Ca^{2+}]_i$  fluctuations of greater  
316 amplitude, total area, frequency, and presumably activation. Our working model (**Fig 6**, bottom) posits  
317 that under naïve conditions many delay and tonic SDH neurons in organotypic spinal cord cultures are  
318 generally in an active state, with some gap junction coupling with neighboring neurons. Long-term  
319 exposure to BDNF causes a homeostatic shift that pushes the SDH into a dampened state marked by  
320 synchronous, low-level activity spread across the network via increased gap junction coupling. This  
321 synchronous activity in turn mitigates the BDNF-activated 'silent' neurons.

322

| Parameter            | Delay neuron<br>Large sEPSCs | Tonic neuron<br>Large sEPSCs | SDH neuron<br>[Ca <sup>2+</sup> ] <sub>i</sub> fluctuations | Silent SDH neuron<br>[Ca <sup>2+</sup> ] <sub>i</sub> fluctuations |
|----------------------|------------------------------|------------------------------|-------------------------------------------------------------|--------------------------------------------------------------------|
| Amplitude            | No effect ↔                  | Significant ↓                | Significant ↓                                               | Predicted ↑                                                        |
| Area under the curve | Significant ↓                | Significant ↓                | Significant ↓                                               | Predicted ↑                                                        |
| Frequency            | Significant ↑                | Significant ↑                | No effect ↔                                                 | Predicted ↑                                                        |
| Activation kinetics  | No effect ↔                  | Significant ↑                | No effect ↔                                                 | Predicted ↑                                                        |

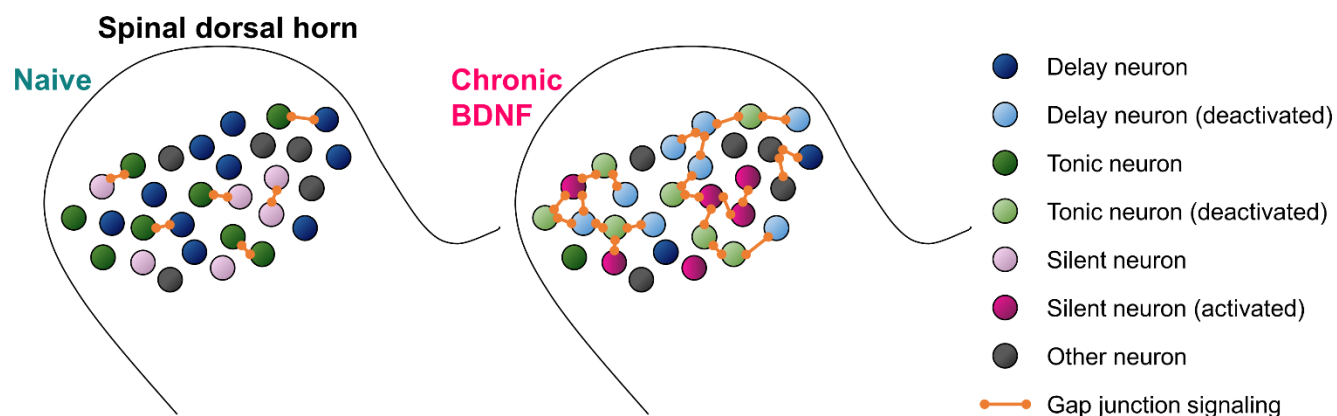

323

324 **Figure 6.** Working model summarizing the effects of chronic BDNF on SDH neurons in this study.

325

326 Several types of oscillatory and/or rhythmic bursting activity have been previously observed in spinal cord  
 327 organotypic cultures (28,29) and in *ex vivo* slice preparations (23,30–32). Synchronous activation of  
 328 groups of spinal nociceptive neurons might contribute to the ‘electric shock’-like sensations experienced  
 329 by some neuropathic pain patients (33). We hypothesize that [Ca<sup>2+</sup>]<sub>i</sub> fluctuations leading to synchronous  
 330 network activity may be attributed to the “shooting pains” that chronic pain patients may experience. In  
 331 particular, “shooting pain” is very commonly experienced by patients with radicular lower back pain  
 332 (sciatica) or trigeminal neuralgia. In these patients, stimulus movement elicits so-called “traveling waves”  
 333 in which neural activity sweeps across the body-part representation in somatosensory maps (34). The  
 334 mechanisms of this have been attributed in part to Ca<sup>2+</sup> waves and gap junctions (34,35). Therefore,  
 335 given the properties of the [Ca<sup>2+</sup>]<sub>i</sub> fluctuations we have identified, they would make a good candidate for  
 336 the neural substrate of shooting pain. In a cohort of chemotherapy-induced peripheral neuropathy (CIPN)  
 337 patients, some of whom reported shooting or burning pain in the hands or feet, serum nerve growth factor  
 338 (NGF) levels were much higher compared with patients with painless or absent CIPN (36). Therefore,  
 339 there is a precedent for the correlation of neurotrophic factors related to BDNF to the incidence of  
 340 shooting pain. Indeed it has been shown that NGF regulates the expression of BDNF (37). It has also  
 341 been demonstrated that BDNF overexpression induces spasticity in rodent models of spinal cord injury,

342 which may also explain the effect of BDNF on influencing network excitability in the dorsal horn (38). With  
343 regards to the involvement of the dorsal horn in shooting pain, it has been shown that dorsal root entry  
344 zone lesioning (DREZotomy) successfully reduces shooting pain caused by brachial plexus root avulsion  
345 (BPRA) (39). Also, in one patient with shooting pain caused by osteoid osteoma, a partial laminectomy  
346 was able to significantly relieve pain symptoms (40). Ideally however, more experiments using human *ex*  
347 *vivo* tissue are needed to determine whether these particular  $[Ca^{2+}]_i$  fluctuations correlate with shooting  
348 pain in patients.

349

350

## 351 **Materials and Methods**

### 352 *Defined-medium organotypic cultures of spinal cord slices*

353 Spinal cords were isolated from embryonic (E13-14) rats and transverse slices ( $300 \pm 25 \mu\text{m}$ ) were  
354 cultured using the roller-tube technique (20,41). Since tissue is obtained from embryos, sex could not be  
355 determined. Serum-free conditions were established after 5 days *in vitro*. Medium was exchanged with  
356 freshly prepared medium every 3-4 days. Slices were treated after 15-21 days *in vitro* for a period of 5-6  
357 days with 50-200 ng/ml in serum-free medium as described previously (20). Age-matched, untreated  
358 DMOTC slices served as controls.

359

### 360 *Calcium imaging*

361 Each organotypic slice was incubated for 1 h prior to imaging with the fluorescent  $Ca^{2+}$ -indicator dye Fluo-  
362 4-AM (Molecular Probes, Invitrogen, Carlsbad, CA, USA). The conditions for incubating the dye were  
363 standardized across different slices to avoid uneven dye loading. After dye loading, the slice was  
364 transferred to a recording chamber and superfused with external solution containing (in mM): 131 NaCl,  
365 2.5 KCl, 1.2  $\text{NaH}_2\text{PO}_4$ , 1.3  $\text{MgSO}_4$ , 26  $\text{NaHCO}_3$ , 25 D-glucose, and 2.5  $\text{CaCl}_2$  (20°C, flow rate 4 ml/min).  
366 Regions of interest (ROI) corresponding to individual cell bodies of neurons were identified based on  
367 morphology and size. Changes in  $Ca^{2+}$ -fluorescence intensity evoked by a high  $K^+$  solution (20, 35, or 50  
368 mM, 90 s application) or other pharmacological agents, were measured in dorsal horn neurons with a  
369 confocal microscope equipped with an argon (488 nm) laser and filters (20x XLUMPlanF1-NA-0.95  
370 objective; Olympus FV300, Markham, Ontario, Canada). Full frame images (512 x 512 pixels) in a fixed  
371 xy plane were acquired at a scanning time of 0.8-1.08 s/frame (42). In some experiments, images were  
372 cropped to accommodate faster scan rates. Selected regions of interest were drawn around distinct cell  
373 bodies and fluorescence intensity traces were generated with FluoView v.4.3 (Olympus).

374

### 375 *Electrophysiology*

376 Whole cell patch-clamp recordings were obtained from neurons in organotypic slice cultures under  
377 infrared differential interference contrast optics. Neurons selected for recording were located 250–800  
378  $\mu\text{m}$  from the dorsal edge of the cultures in an area presumed to reflect the *substantia gelatinosa* and up  
379 to a depth of 100  $\mu\text{m}$  from the surface. Neurons were categorized according to their firing pattern in  
380 response to depolarizing current commands as tonic, delay, phasic, irregular, or transient (27).  
381 Recordings were obtained with an NPI SEC-05LX amplifier (ALA Scientific Instruments, Westbury, NY,  
382 USA) in bridge balance or in discontinuous, single electrode, current or voltage-clamp mode. Neurons  
383 were sampled at 2k Hz for 180 seconds when measuring sEPSCs. For recording, slices were superfused  
384 at room temperature ( $\sim 22^\circ\text{C}$ ) with 95% O<sub>2</sub>-5% CO<sub>2</sub>-saturated aCSF that contained (in mM) 127 NaCl,  
385 2.5 KCl, 1.2 NaH<sub>2</sub>PO<sub>4</sub>, 26 NaHCO<sub>3</sub>, 1.3 MgSO<sub>4</sub>, 2.5 CaCl<sub>2</sub>, and 25 d-glucose, pH 7.4. Patch pipettes  
386 were pulled from thin-walled borosilicate glass (1.5/1.12 mm OD/ID; WPI, Sarasota, FL) to 5- to 10-M $\Omega$   
387 resistances when filled with an internal solution containing (in mM) 130 potassium gluconate, 1 MgCl<sub>2</sub>, 2  
388 CaCl<sub>2</sub>, 10 HEPES, 10 EGTA, 4 Mg-ATP, and 0.3 Na-GTP, pH 7.2, 290–300 mosM.

389

#### 390 *Drugs and chemicals*

391 Unless otherwise stated, all chemicals were from Sigma (St. Louis, MO, USA). Fluo-4 AM dye was  
392 dissolved in a mixture of dimethyl sulfoxide (DMSO) and 20% pluronic acid (Invitrogen, Burlington,  
393 Ontario, Canada) to a 0.5 mM stock solution and kept frozen until used. The dye was thawed and  
394 sonicated thoroughly before incubating with a DMOTC slice. TTX was dissolved in distilled water as a 1  
395 mM stock solution and stored at  $-20^\circ\text{C}$  until use. TTX was diluted to a final desired concentration of 1  $\mu\text{M}$   
396 in external recording solution on the day of the experiment. Strychnine was prepared in a similar manner  
397 to TTX, and bicuculline (Tocris, Ballwin, MO, USA) was dissolved in DMSO as a 10 mM stock solution.  
398 6-cyano-7-nitroquinoxaline-2,3-dione (CNQX, Tocris), 2,3-dihydroxy-6-nitro-7-sulfamoyl-  
399 benzo[f]quinoxaline-2,3-dione (NBQX, Tocris) and N,N,H-Trimethyl-5-[(tricyclo[3.3.1.1<sup>3,7</sup>]dec-1-  
400 ylmethyl)amino]-1-pentanaminiumbromide hydrobromide (IEM-1460, Tocris) were prepared as 10 mM  
401 stocks dissolved in distilled water, and D(-)-2-Amino-5-phosphonopentanoic acid (D-AP5, Tocris) was  
402 prepared as 50 mM stocks dissolved in 30% 1 M NaOH. Riluzole was prepared as a 10 mM stock,  
403 kynurinic acid and GABA as 1 M stocks, and nitrendipine as a 1 mM stock made up in distilled water.  
404 These drugs were used at a 1:1000 dilution prepared freshly with external recording solution immediately  
405 prior to the start of experiments.

406

#### 407 *Data analysis and statistical testing*

408 Raw time-lapse calcium fluorescence intensity and whole-cell voltage-clamp recordings were analyzed  
409 using the Frequency-Independent Biological Signal Identification (FIBSI) program (21) written using the

410 Anaconda v2019.7.0.0 (Anaconda, Inc, Austin, TX) distribution of Python v3.5.2 and the NumPy and  
411 matplotlib.pyplot libraries. The FIBSI program incorporates the Ramer-Douglas-Peucker algorithm to  
412 detect significant waveforms against a time-dependent generated reference line using the least number  
413 of total points to represent said waveform, and provides quantitative measurements for each detected  
414 waveform. The calcium fluorescence traces were fit using a sliding median with a window size between  
415 5-25 s, and peaks below the sliding median line were traced together to form the reference line. The  
416 voltage-clamp traces were fit using a sliding median with a window of 50 ms, and peaks above the sliding  
417 median were traced together to form the reference line. A custom Python script was used to match  
418 sEPSCs detected in filtered voltage-clamp recordings with the unfiltered recordings. The detected  
419 sEPSCs for each neuron were clustered based on their amplitude, charge transfer, and interevent interval  
420 using the partitioning around medoids function (default settings, manhattan distance used) in the cluster  
421 v2.1.0 package in R v4.0.2 (2020-06-22; R Core Team, The R Foundation for Statistical Computing,  
422 Vienna, Austria). Each neuron was clustered independently. The average silhouette width method was  
423 used to select the optimal number of clusters for each neuron. Clusters were graphed using the plotly  
424 v4.9.2.1 package with dependency on ggplot2. The FIBSI source code, custom Python matching script,  
425 and a tutorial for using FIBSI are available on a GitHub repository  
426 ([https://github.com/rmcassidy/FIBSI\\_program](https://github.com/rmcassidy/FIBSI_program)).

427  
428 Statistical analysis of the calcium fluctuations and sEPSCs were performed using Prism v8.2.1  
429 (GraphPad Software, Inc, La Jolla, CA). The comparison between the proportion of 'silent' neurons in the  
430 naïve and BDNF treatment conditions was made using Fisher's exact test. The Brown-Forsythe and  
431 Welch ANOVA tests and Games-Howell post-hoc test (for  $n > 50$ ) were used to compare the effects of  
432 BDNF when the calcium fluctuations from all neurons were grouped together. To control for differences  
433 in recording times, the means for each fluctuation parameter (amplitude, AUC, etc.) were calculated for  
434 each neuron (fluctuations  $< 10\%$  the maximal amplitude in each neuron were omitted to remove the  
435 effects of low-amplitude noise). The amplitude and AUC means were normalized across all neurons to  
436 permit direct comparisons. Normality was assessed using the D'Agostino & Pearson omnibus test, and  
437 nonparametric comparisons between group medians were made using the Kruskal-Wallis test and  
438 Dunn's post-hoc test. Two-way repeated measures ANOVAs and Sidak's post-hoc tests were used to  
439 compare the pre- and post-treatment effects of octanol on the calcium fluctuations. Adjacency matrixes  
440 for neurons imaged together from the same organotypic culture were constructed using Pearson  
441 correlation matrixes; the FIBSI-processed calcium fluctuation recordings were used as input. Next, the  
442 mean Pearson  $r$  coefficient for each neuron within a culture was calculated using the Fisher Z  
443 transformation (steps shown in Fig 3A). The mean Pearson  $r$  coefficients in the naïve and BDNF

444 conditions were not normally distributed, so the comparison between the two was made using a Mann-  
445 Whitney test. Comparisons between the pre- and post-treatment effects of octanol were first made using  
446 a Wilcoxon matched-pairs signed rank test, and then using a two-way repeated measures ANOVA and  
447 Sidak's post-hoc test. Paired t-tests were used for pharmacology experiments. Brown-Forsythe and  
448 Welch ANOVA tests and Games-Howell post-hoc test were used to compare the effects of BDNF on the  
449 sEPSC clusters. Statistical significant was set to  $P < 0.05$  and all reported  $P$  values are two-tailed. Details  
450 for the statistical analyses can be found in Table 1.

451

452

### 453 **Acknowledgements**

454 We thank Edgar Walters for useful discussions. We thank Klaus Ballanyi and Araya Ruangkittisakul for  
455 use of and technical assistance with confocal imaging equipment.

456

### 457 **Competing Interests**

458 We have no competing interests to disclose.

459

460

461 **References**

- 462 1. Finnerup NB, Haroutounian S, Kamerman P, Baron R, Bennett DLH, Bouhassira D, et al.  
463 Neuropathic pain: an updated grading system for research and clinical practice. *PAIN*. 2016  
464 Aug;157(8):1599–606.
- 465 2. Alles SRA, Smith PA. Etiology and Pharmacology of Neuropathic Pain. *Pharmacol Rev*.  
466 2018;70(2):315–47.
- 467 3. Sandkuhler J. Models and mechanisms of hyperalgesia and allodynia. *Physiol Rev*. 2009  
468 Apr;89:707–58.
- 469 4. Stemkowski PL, Smith PA. Sensory neurons, ion channels, inflammation and the onset of  
470 neuropathic pain. *Can J Neurol Sci J Can Sci Neurol*. 2012 Jul;39(4):416–35.
- 471 5. Abdulla FA, Smith PA. Axotomy- and autotomy-induced changes in the excitability of rat dorsal  
472 root ganglion neurons. *J Neurophysiol*. 2001 Feb;85:630–43.
- 473 6. Amir R, Michaelis M, Devor M. Membrane potential oscillations in dorsal root ganglion neurons:  
474 role in normal electrogenesis and neuropathic pain. *J Neurosci Off J Soc Neurosci*. 1999 Oct  
475 1;19(19):8589–96.
- 476 7. Djouhri L, Smith T, Ahmeda A, Alotaibi M, Weng X. Hyperpolarization-activated cyclic nucleotide-  
477 gated channels contribute to spontaneous activity in L4 C-fiber nociceptors, but not A $\beta$ -non-  
478 nociceptors, after axotomy of L5-spinal nerve in the rat in vivo. *PAIN*. 2018 Jul;159(7):1392–1402.
- 479 8. Djouhri L, Zeidan A, Abd El-Aleem SA, Smith T. Cutaneous A $\beta$ -Non-nociceptive, but Not C-  
480 Nociceptive, Dorsal Root Ganglion Neurons Exhibit Spontaneous Activity in the Streptozotocin Rat  
481 Model of Painful Diabetic Neuropathy in vivo. *Front Neurosci* [Internet]. 2020 [cited 2020 Sep  
482 15];14. Available from: <https://www.frontiersin.org/articles/10.3389/fnins.2020.00530/full>
- 483 9. Boakye PA, Rancic V, Whitlock KH, Simmons D, Longo FM, Ballanyi K, et al. Receptor  
484 dependence of BDNF actions in superficial dorsal horn: relation to central sensitization and  
485 actions of macrophage colony stimulating factor 1. *J Neurophysiol*. 2019 01;121(6):2308–22.
- 486 10. Coull JA, Beggs S, Boudreau D, Boivin D, Tsuda M, Inoue K, et al. BDNF from microglia causes  
487 the shift in neuronal anion gradient underlying neuropathic pain. *Nature*. 2005 Dec 15;438:1017–  
488 21.
- 489 11. Guan Z, Kuhn JA, Wang X, Colquitt B, Solorzano C, Vaman S, et al. Injured sensory neuron-  
490 derived CSF1 induces microglial proliferation and DAP12-dependent pain. *Nat Neurosci*. 2016  
491 Jan;19(1):94–101.
- 492 12. Scholz J, Woolf CJ. The neuropathic pain triad: neurons, immune cells and glia. *Nat Neurosci*.  
493 2007 Nov;10(11):1361–8.
- 494 13. Tsuda M, Shigemoto-Mogami Y, Koizumi S, Mizokoshi A, Kohsaka S, Salter MW, et al. P2X4  
495 receptors induced in spinal microglia gate tactile allodynia after nerve injury. *Nature*. 2003 Aug  
496 14;424:778–83.



- 497 14. Ulmann L, Hatcher JP, Hughes JP, Chaumont S, Green PJ, Conquet F, et al. Up-regulation of  
498 P2X4 receptors in spinal microglia after peripheral nerve injury mediates BDNF release and  
499 neuropathic pain. *J Neurosci*. 2008 Oct 29;28:11263–8.
- 500 15. Woolf CJ. Evidence for a central component of post-injury pain hypersensitivity. *Nature*.  
501 1983;306:686–8.
- 502 16. Coull JA, Boudreau D, Bachand K, Prescott SA, Nault F, Sik A, et al. Trans-synaptic shift in anion  
503 gradient in spinal lamina I neurons as a mechanism of neuropathic pain. *Nature*. 2003 Aug  
504 21;424:938–42.
- 505 17. Ferrini F, Perez-Sanchez J, Ferland S, Lorenzo L-E, Godin AG, Plasencia-Fernandez I, et al.  
506 Differential chloride homeostasis in the spinal dorsal horn locally shapes synaptic metaplasticity  
507 and modality-specific sensitization. *Nat Commun*. 2020 Dec;11(1):3935.
- 508 18. Lu VB, Biggs JE, Stebbing MJ, Balasubramanyan S, Todd KG, Lai AY, et al. Brain-derived  
509 neurotrophic factor drives the changes in excitatory synaptic transmission in the rat superficial  
510 dorsal horn that follow sciatic nerve injury. *J Physiol*. 2009 Mar 1;587:1013–32.
- 511 19. Biggs JE, Lu VB, Stebbing MJ, Balasubramanyan S, Smith PA. Is BDNF sufficient for information  
512 transfer between microglia and dorsal horn neurons during the onset of central sensitization? *Mol*  
513 *Pain*. 2010;6:44.
- 514 20. Lu VB, Ballanyi K, Colmers WF, Smith PA. Neuron type-specific effects of brain-derived  
515 neurotrophic factor in rat superficial dorsal horn and their relevance to “central sensitization.” *J*  
516 *Physiol*. 2007 Oct 15;584:543–63.
- 517 21. Cassidy RM, Bavencoffe AG, Lopez ER, Cheruvu SS, Walters ET, Uribe RA, et al. Frequency-  
518 independent biological signal identification (FIBSI): A free program that simplifies intensive  
519 analysis of non-stationary time series data. *bioRxiv*. 2020 Jun 11;2020.05.29.123042.
- 520 22. Smith PA. BDNF: no gain without pain? *Neuroscience*. 2014 Dec 26;283:107–23.
- 521 23. Asghar AUR, Cilia La Corte PF, LeBeau FEN, Al Dawoud M, Reilly SC, Buhl EH, et al. Oscillatory  
522 activity within rat substantia gelatinosa in vitro: a role for chemical and electrical  
523 neurotransmission. *J Physiol*. 2005 Jan 1;562(Pt 1):183–98.
- 524 24. Chapman RJ, La Corte PFC, Asghar AUR, King AE. Network-based activity induced by 4-  
525 aminopyridine in rat dorsal horn in vitro is mediated by both chemical and electrical synapses. *J*  
526 *Physiol*. 2009 Jun 1;587(Pt 11):2499–510.
- 527 25. Ochalski PAY, Frankenstein UN, Hertzberg EL, Nagy JI. Connexin-43 in rat spinal cord:  
528 localization in astrocytes and identification of heterotypic astro-oligodendrocytic gap junctions.  
529 *Neuroscience*. 1996 Dec 11;76(3):931–45.
- 530 26. Kay CWP, Ursu D, Sher E, King AE. The role of Cx36 and Cx43 in 4-aminopyridine-induced  
531 rhythmic activity in the spinal nociceptive dorsal horn: an electrophysiological study in vitro.  
532 *Physiol Rep*. 2016;4(14).
- 533 27. Lu VB, Colmers WF, Smith PA. Long-term actions of BDNF on inhibitory synaptic transmission in  
534 identified neurons of the rat substantia gelatinosa. *J Neurophysiol*. 2012 Jul;108(2):441–52.



- 535 28. Fabbro A, Pastore B, Nistri A, Ballerini L. Activity-independent intracellular Ca<sup>2+</sup> oscillations are  
536 spontaneously generated by ventral spinal neurons during development in vitro. *Cell Calcium*.  
537 2007 Apr;41(4):317–29.
- 538 29. Sibilla S, Fabbro A, Grandolfo M, D'Andrea P, Nistri A, Ballerini L. The patterns of spontaneous  
539 Ca<sup>2+</sup> signals generated by ventral spinal neurons in vitro show time-dependent refinement. *Eur J*  
540 *Neurosci*. 2009 Apr;29(8):1543–59.
- 541 30. Bardoni R, Ghirri A, Zonta M, Betelli C, Vitale G, Ruggieri V, et al. Glutamate-mediated astrocyte-  
542 to-neuron signalling in the rat dorsal horn. *J Physiol*. 2010 Mar 1;588(Pt 5):831–46.
- 543 31. Li J, Baccei ML. Pacemaker Neurons within Newborn Spinal Pain Circuits. *J Neurosci*. 2011 Jun  
544 15;31(24):9010–22.
- 545 32. Ruscheweyh R, Sandkühler J. Long-range oscillatory Ca<sup>2+</sup> waves in rat spinal dorsal horn. *Eur J*  
546 *Neurosci*. 2005 Oct;22(8):1967–76.
- 547 33. Baron R, Binder A, Wasner G. Neuropathic pain: diagnosis, pathophysiological mechanisms, and  
548 treatment. *Lancet Neurol*. 2010 Aug;9(8):807–19.
- 549 34. Defrin R, Brill S, Goor-Arieh I, Wood I, Devor M. “Shooting pain” in lumbar radiculopathy and  
550 trigeminal neuralgia, and ideas concerning its neural substrates. *Pain*. 2020;161(2):308–18.
- 551 35. Hanani M. Intercellular communication in sensory ganglia by purinergic receptors and gap  
552 junctions: implications for chronic pain. *Brain Res*. 2012 Dec 3;1487:183–91.
- 553 36. Velasco R, Navarro X, Gil-Gil M, Herrando-Grabulosa M, Calls A, Bruna J. Neuropathic Pain and  
554 Nerve Growth Factor in Chemotherapy-Induced Peripheral Neuropathy: Prospective Clinical-  
555 Pathological Study. *J Pain Symptom Manage*. 2017;54(6):815–25.
- 556 37. Pezet S, McMahon SB. Neurotrophins: mediators and modulators of pain. *Annu Rev Neurosci*.  
557 2006;29:507–38.
- 558 38. Fouad K, Bennett DJ, Vavrek R, Blesch A. Long-Term Viral Brain-Derived Neurotrophic Factor  
559 Delivery Promotes Spasticity in Rats with a Cervical Spinal Cord Hemisection. *Front Neurol*  
560 [Internet]. 2013 Nov 19 [cited 2020 Jul 21];4. Available from:  
561 <https://www.ncbi.nlm.nih.gov/pmc/articles/PMC3832889/>
- 562 39. Yanagisawa T, Fukuma R, Seymour B, Hosomi K, Kishima H, Shimizu T, et al. MEG-BMI to  
563 Control Phantom Limb Pain. *Neurol Med Chir (Tokyo)*. 2018 Aug 15;58(8):327–33.
- 564 40. Sarmiento JM, Chan JL, Cohen JD, Mukherjee D, Chu RM. L5 Osteoid Osteoma Treated with  
565 Partial Laminectomy and Cement Augmentation. *Cureus*. 2019 Mar 12;11(3):e4239.
- 566 41. Biggs JE, B. Lu, Kim HJ, Lai A, Todd KG, Ballanyi K, et al. Defined Medium Organotypic Cultures  
567 of Spinal Cord Put ‘Pain in a Dish’ #. In: *T Isolated Central Nervous System Circuits*. 2012. p.  
568 405–36. (Neuromethods; vol. 73).
- 569 42. Ruangkittisakul A, Schwarzacher SW, Secchia L, Poon BY, Ma Y, Funk GD, et al. High sensitivity  
570 to neuromodulator-activated signaling pathways at physiological [K<sup>+</sup>] of confocally imaged

571 respiratory center neurons in on-line-calibrated newborn rat brainstem slices. *J Neurosci Off J Soc*  
572 *Neurosci.* 2006 Nov 15;26(46):11870–80.

573

574 **Supplemental Figures**

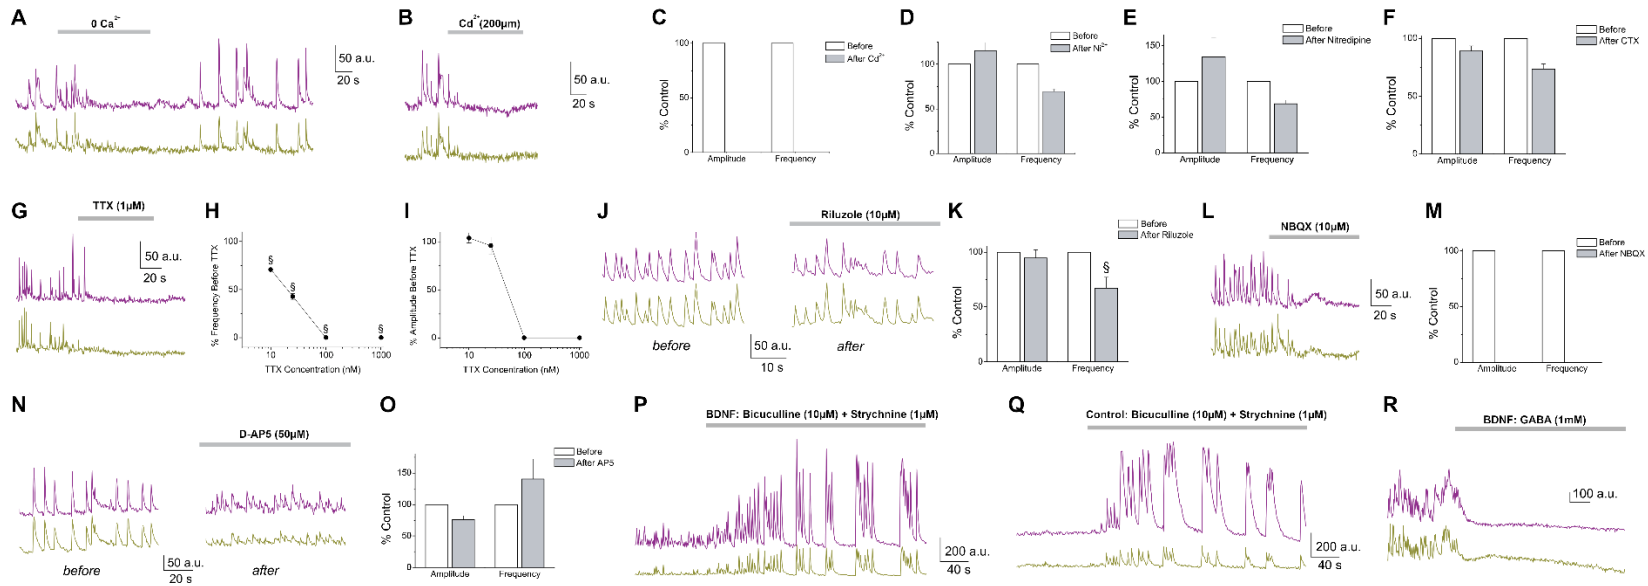

575

576 **Supplementary Figure 1.** Pharmacology of BDNF-induced Ca<sup>2+</sup> fluctuations. Dependence of BDNF-induced Ca<sup>2+</sup> fluctuations on  
 577 extracellular Ca<sup>2+</sup> entry through voltage-gated Ca<sup>2+</sup> channels. **(A)** Perfusion of extracellular recording solution free of Ca<sup>2+</sup> (0 Ca<sup>2+</sup>)  
 578 marked by a thick grey line. Note the complete block of the fluctuations in recorded cells. **(B)** Addition of 200 μM Cd<sup>2+</sup>, marked by a  
 579 thick grey line, abolished Ca<sup>2+</sup> oscillations in a BDNF-treated slice. **(C)** Measurement of fluctuation amplitude and frequency before  
 580 and after application of Cd<sup>2+</sup>. Values normalized to control values obtained before addition of Cd<sup>2+</sup>. **(D-F)** Effect of 100 μM Ni<sup>2+</sup>, 1  
 581 μM nitrendipine, and 100 nM ω-conotoxin GVIA on BDNF-induced fluctuation amplitude and frequency. Dependence of BDNF-induced  
 582 Ca<sup>2+</sup> fluctuations on TTX-sensitive voltage-gated Na<sup>+</sup> current but not persistent Na<sup>+</sup> current. **(G)** Addition of 1 μM TTX, marked by a  
 583 thick grey line, abolished Ca<sup>2+</sup> fluctuations in a BDNF-treated slice. **(H)** Concentration-inhibition curve for increasing concentrations of  
 584 TTX on Ca<sup>2+</sup> fluctuation frequency. **(I)** Concentration-inhibition curve for increasing concentrations of TTX on Ca<sup>2+</sup> fluctuation  
 585 amplitude. Error bars indicate standard error of the mean. For paired t-test, § = p<0.001. **(J)** Sample synchronous Ca<sup>2+</sup> fluctuation  
 586 traces from a BDNF-treated slice before (left) and after (right) application of 10 μM riluzole. **(K)** Effect of riluzole on average Ca<sup>2+</sup>

587 fluctuation amplitude and frequency. BDNF-induced Ca<sup>2+</sup> fluctuations mediated by AMPA/kainate  
588 glutamate receptors. **(L)** Addition of 10 μM NBQX, marked by a thick grey line, abolished Ca<sup>2+</sup>  
589 fluctuations in a BDNF-treated slice. **(M)** Measurement of fluctuation amplitude and frequency before and  
590 after application of NBQX. **(N)** Sample fluorescent Ca<sup>2+</sup> traces from a BDNF-treated slice before (left)  
591 and after (right) application of 50 μM AP5. **(O)** Effect of AP5 on average Ca<sup>2+</sup> fluctuation amplitude and  
592 frequency. Amplification of BDNF-induced Ca<sup>2+</sup> oscillations by pharmacological removal of inhibition and  
593 suppression of oscillatory activity by GABA. **(P)** Addition of 10 μM bicuculline and 1 μM strychnine to a  
594 BDNF-treated slice produced robust fluctuations larger in amplitude but slower in frequency than the  
595 spontaneous Ca<sup>2+</sup> fluctuations observed before antagonist application. **(Q)** Addition of 10 μM bicuculline  
596 and 1 μM strychnine to a control DMOTC slice produced similar robust fluctuations as those observed in  
597 P. **(R)** Application of 1 mM GABA, marked by a thick grey line, stopped BDNF-induced Ca<sup>2+</sup> fluctuations.  
598 Average values represented. Error bars indicate standard error of the mean. For paired t-test, § =  
599 p<0.001, n=5-20 cells per condition.

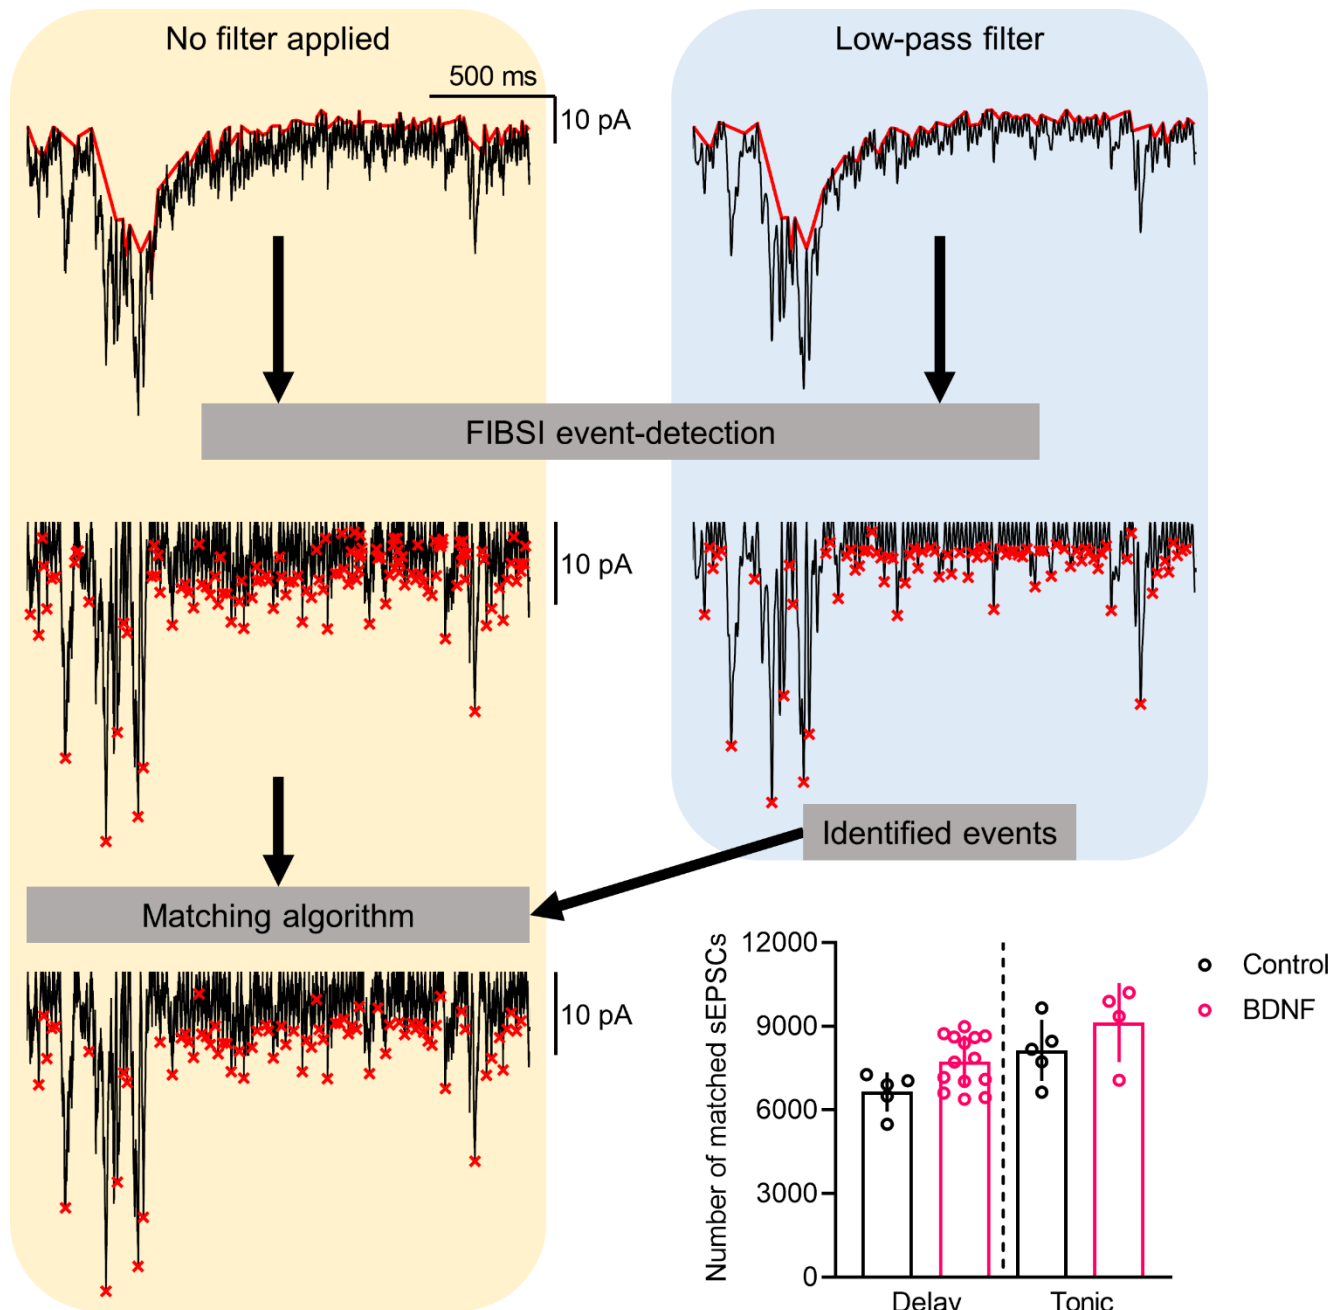

600

601 **Supplementary Figure 2.** Matching filtered spontaneous EPSCs detected by FIBSI with the raw  
602 recordings. All raw recordings were first analyzed by FIBSI without pre-processing filtering. All recordings  
603 were analyzed again following application of a low-pass filter with  $\alpha = 0.05$ . The output text files generated  
604 by FIBSI containing descriptive parameters (e.g., start time, peak time, amplitude, etc.) for each detected  
605 event were used as input to a custom Python script. The matching algorithm matched events detected in  
606 the filtered recordings with their corresponding events in the unfiltered recordings. Events were matched

607 based on peak event time and amplitude. Unmatched events were discarded from further analyses. The  
 608 total number of matched sEPSCs in the delay and tonic neurons are shown.

609

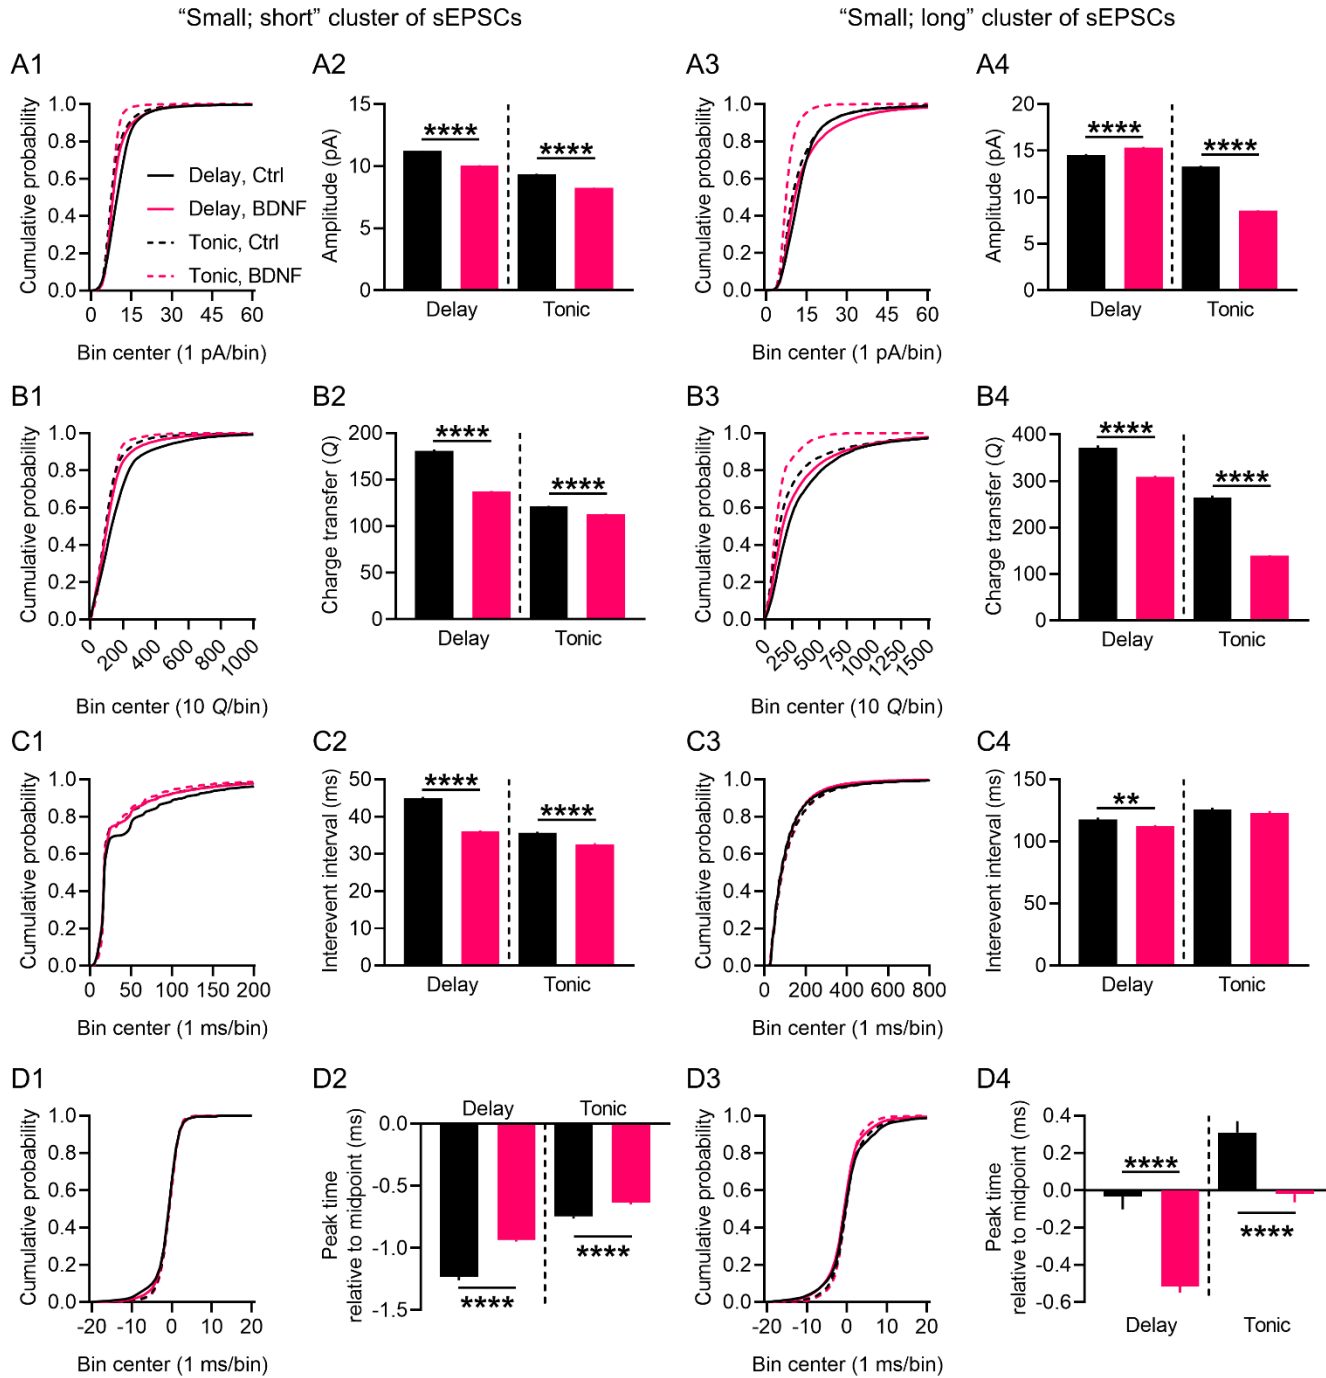

610

611 **Supplementary Figure 3.** Effects of BDNF on the two small clusters of spontaneous EPSCs in delay  
 612 and tonic-firing superficial dorsal horn neurons. Consistent, statistically significant effects of BDNF were

613 observed for the ‘small; short’ cluster of sEPSCs in the delay and tonic neurons; amplitudes were smaller  
614 **(A1-A2)**, charge transfer values were smaller **(B1-B2)**, within cluster interevent intervals were shorter  
615 **(C1-C2)**, and kinetics were slower **(D1-D2)**. Nuanced effects of BDNF were observed for the “small; long”  
616 cluster of sEPSCs in the two neuron types; sEPSC amplitudes were increased in delay neurons and  
617 decreased in tonic neurons **(A3-A4)** while charge transfer values were decreased in both types of  
618 neurons **(B3-B4)**. Interevent intervals in the delay neurons were significantly decreased, but not in the  
619 tonic neurons **(C3-C4)**. The sEPSC kinetics were significantly faster in the BDNF-treated delay and tonic  
620 neurons **(D3-D4)**. Small; short sEPSC cluster sample sizes: delay neurons control n = 20062, BDNF n =  
621 69670; tonic neurons control n = 25235, BDNF n = 22086. Small; long sEPSC cluster sample sizes: delay  
622 neurons control n = 7638, BDNF n = 22391; tonic neurons control n = 7160, BDNF n = 5851. Comparisons  
623 between means in the control and BDNF conditions were made using Brown-Forsythe and Welch’s  
624 ANOVA tests and Games-Howell post-hoc test. **\*\*P < 0.01, \*\*\*\*P < 0.0001.**

625
